# Supplementary material
Source: MDPI journal article supplement (https://www.mdpi.com/1999-4907/15/3/566)

|                            |                                  |       |       |       |       |       |       |       |       |       |       |       |       |       |       |       |       |
|----------------------------|----------------------------------|-------|-------|-------|-------|-------|-------|-------|-------|-------|-------|-------|-------|-------|-------|-------|-------|
| 95                         | 4-Fluorobenzoic acid             | -     | -     | -     | -     | -     | 0.24  |       | -     | -     | -     | -     | -     | -     | -     | -     | -     |
| 97                         | 3-Fluorobenzoic acid             | -     | -     | -     | -     | -     | -     | 0.17  | -     | -     | -     | -     | -     | -     | -     | -     | -     |
| 98                         | 2,6-Octadienal                   | -     | -     | -     | 0.52  | -     | -     | -     | -     | -     | -     | -     | -     | -     | -     | -     | -     |
| 99                         | 1H-Benzocycloheptene             | -     | -     | -     | 0.2   | -     | -     | -     | -     | -     | -     | -     | -     | -     | -     | -     | -     |
| 100                        | 1H-Cycloprop[elazulen-7-ol       | -     | -     | -     | -     | -     | 1.28  |       |       | 0.51  | -     | -     | -     | -     | -     | -     | -     |
| 101                        | Phenanthrene                     | -     | -     | -     | -     | -     | 0.12  | -     | -     | -     | -     | -     | -     | -     | -     | -     | -     |
| 102                        | Cyclododecene                    | -     | -     | -     | 0.11  | -     | -     | -     | -     | -     | -     | -     | -     | -     | -     | -     | -     |
| 103                        | 1,3-Cyclododecadiene             | -     | -     | -     | -     | 0.65  | 0.6   | -     | -     | -     | -     | -     | -     | -     | -     | -     | -     |
| 104                        | Tridecane                        | 0.19  | -     | -     | -     | 0.14  | -     | -     | -     | -     | -     | -     | -     | -     | -     | -     | -     |
| 105                        | Phenanthrene                     | 0.28  | -     | -     | -     | -     | -     | -     | -     | -     | -     | -     | -     | -     | -     | -     | -     |
| 106                        | 3-Tetradecen-5-yne               | -     | -     | -     | -     | 0.35  | -     | -     | -     | -     | -     | -     | -     | -     | -     | -     | -     |
| 108                        | 3-Tetradecen-5-yne               | -     | -     | -     | -     | -     | -     | 0.2   | -     | -     | -     | -     | -     | -     | -     | -     | -     |
| 109                        | n-Hexadecanoic acid              | 0.23  | 0.27  | -     | -     | -     | -     | 0.12  | -     | -     | -     | -     | -     | -     | -     | -     | -     |
| 110                        | Octadecanoic acid                | 0.24  | -     | -     | -     | -     | -     | -     | -     | -     | -     | -     | -     | -     | -     | -     | -     |
| 111                        | 1H-Indene, 5-butyl-6-hexyloctahy | 0.11  | -     | -     | -     | -     | -     | -     | -     | -     | -     | -     | -     | -     | -     | -     | -     |
| 112                        | Tetracosane                      | 0.18  | 0.39  | 7.09  | -     | 0.31  | -     | -     | -     | -     | -     | -     | -     | -     | -     | -     | -     |
| 113                        | Pentacosane                      | 0.24  | -     | -     | -     | -     | -     | -     | -     | -     | -     | -     | -     | -     | -     | -     | -     |
| 114                        | Hydrazine                        | -     | 0.16  | -     | -     | -     | -     | -     | -     | -     | -     | -     | -     | -     | -     | -     | -     |
| 115                        | Silicic acid                     | -     | 0.19  | -     | -     | -     | -     | -     | -     | -     | -     | -     | -     | -     | -     | -     | -     |
| 116                        | Carbonic acid                    | -     | 0.37  | -     | -     | -     | -     | -     | -     | -     | -     | -     | -     | -     | -     | -     | -     |
| 117                        | Acetic acid                      | 0.52  | -     | -     | 13.91 | -     | -     | -     | 5.15  | -     | -     | 0.57  | -     | -     | -     | -     | 3.92  |
| Total identified compounds |                                  | 86.97 | 93.98 | 99.56 | 95.96 | 90.51 | 92.93 | 95.24 | 91.27 | 90.34 | 85.65 | 82.93 | 91.21 | 72.53 | 72.4  | 74.7  | 85.89 |
| Monoterpene Hydrocarbons   |                                  | 23.8  | 31.34 | 44.14 | 38.43 | 31.51 | 28.36 | 28.96 | 24.43 | 35.47 | 25.47 | 36.02 | 26.47 | 19.05 | 17.49 | 14.68 | 29.79 |
| Oxygennted Monoterpenes    |                                  | 4.79  | 3.98  | 1.36  | 4.65  | 3.58  | 3.03  | 1.79  | 8.44  | 4.3   | 6.62  | 5.76  | 2.14  | 10.18 | 13.75 | 11.19 | 2.3   |
| Sesquiterpene Hydrocarbons |                                  | 21.31 | 24.74 | 22.14 | 7.61  | 23.75 | 30.82 | 39.15 | 12.43 | 20.87 | 12.29 | 6.25  | 31.69 | 9.85  | 8.94  | 7.87  | 22.26 |
| Oxygenated Sesquiterpenes  |                                  | 6.89  | 1.47  | 0.41  | 11.76 | 4.1   | 1.24  | 2.4   | 10.07 | 2.43  | 8.04  | 9.88  | 2.52  | 0.5   | 0.24  | 1.68  | 2.7   |
| Oxygenated Diterpene       |                                  | 1.79  | 0.91  | -     | -     | 0.28  | 0.44  | 1.04  | 2.5   | -     | -     | -     | -     | 0.1   | -     | -     | -     |
| Aldehyde                   |                                  | -     | 0.19  | -     | -     | 0.31  | 0.76  | -     | -     | -     | -     | -     | -     | -     | -     | -     | -     |
| Ketone                     |                                  | -     | -     | -     | -     | -     | 0.2   | 0.47  | -     | 0.43  | 1.35  | -     | -     | 0.4   | -     | -     | -     |
| Phenol                     |                                  | 1.53  | 1.89  | 1.13  | 0.13  | 1.28  | 1.38  | 1.42  | 2.98  | 3.23  | 3.32  | 2.72  | 0.27  | 0.65  | 0.46  | 1.02  | 1.71  |
| Alcohol                    |                                  | 9.31  | 4.15  | 18.75 | 4.93  | 2.03  | 4.45  | 1.8   | 10.83 | 3.67  | 9.71  | 3.89  | 11.33 | 18.88 | 18.23 | 23.06 | 3.87  |
| Ester                      |                                  | 5.6   | 6.74  | -     | -     | 5.59  | 3.7   | 4.99  | -     | 9.26  | 10.43 | 9.24  | -     | 3.18  | 1.22  | 1.23  | -     |
| Hydrocarbons               |                                  | 9.55  | 17.27 | 4.54  | 13.07 | 16.7  | 16.35 | 12.34 | 14.68 | 10.03 | 8.02  | 8.6   | 16.86 | 8.02  | 10.74 | 12.83 | 19.51 |

-: Not dected.

Terpenes are indicated in yellow in compounds column (numbers 1 to 71).

Figure S1. Chromatograms of essential oils extracted from needles of *P. densiflora*, *P. koraiensis*, *A. holophylla*, and *J. chinensis* by seasons (spring, summer, and autumn, and winter)

1. *Pinus densiflora* / Spring

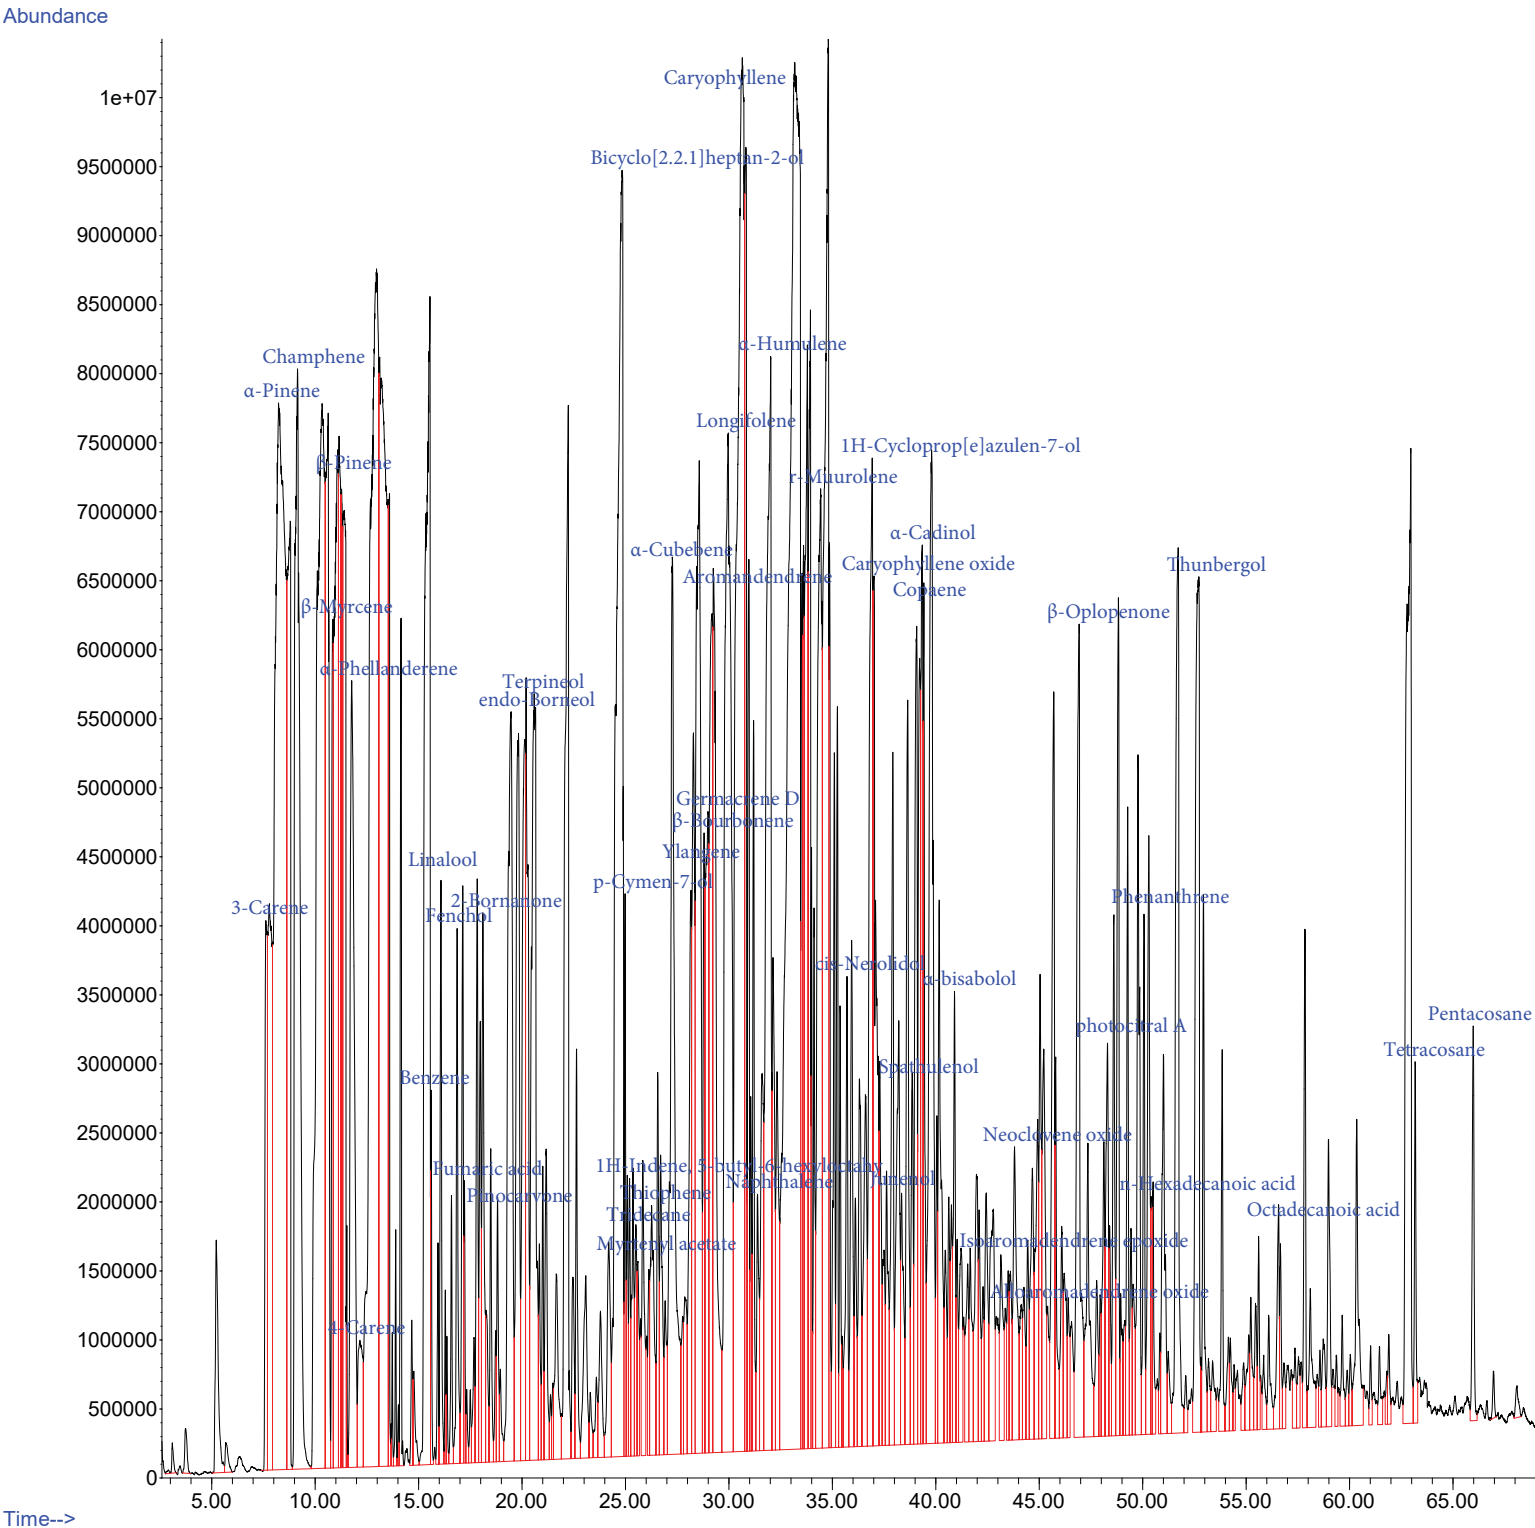

2. *Pinus densiflora* / Summer

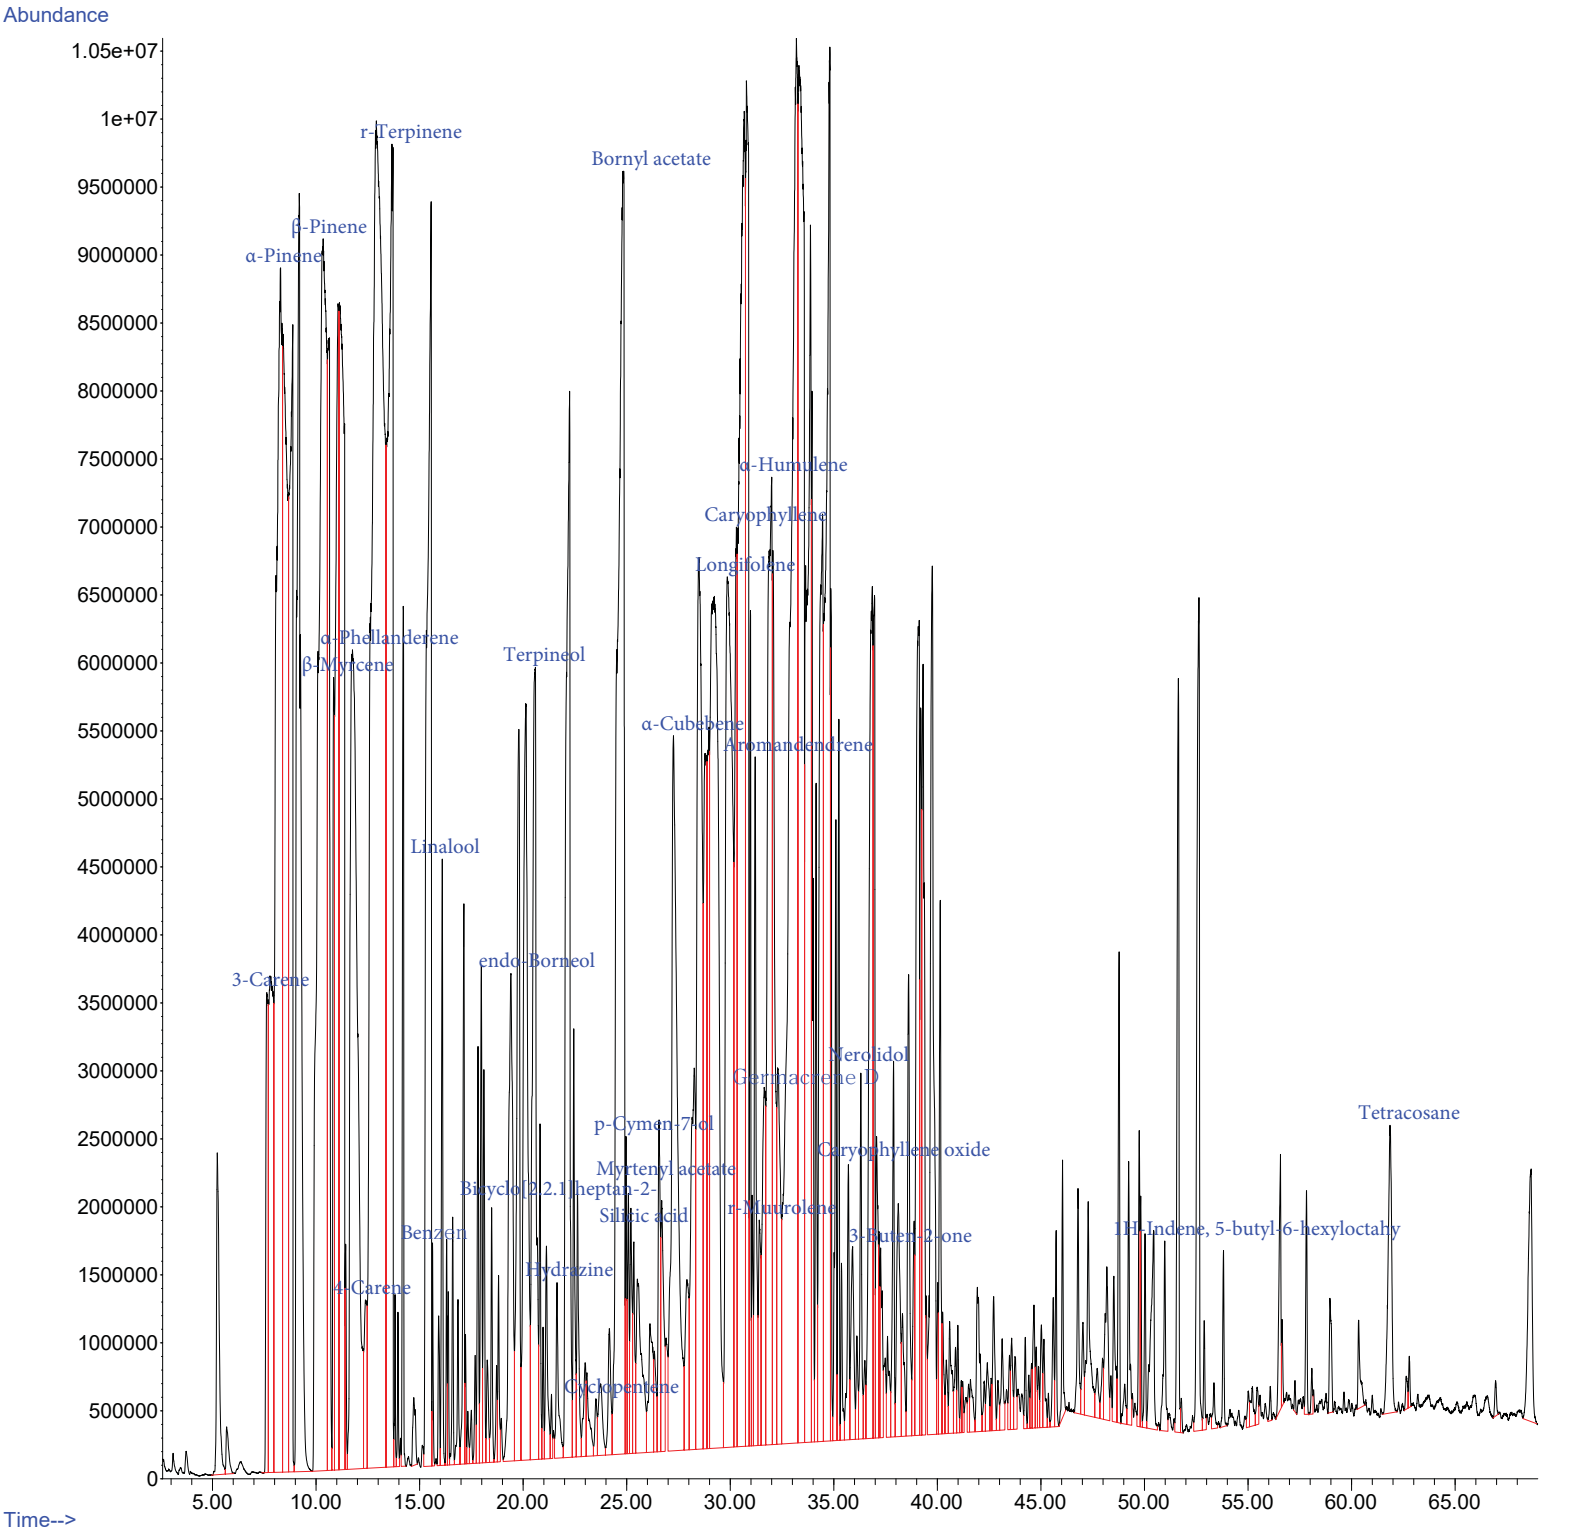

3. *Pinus densiflora* / Autumn

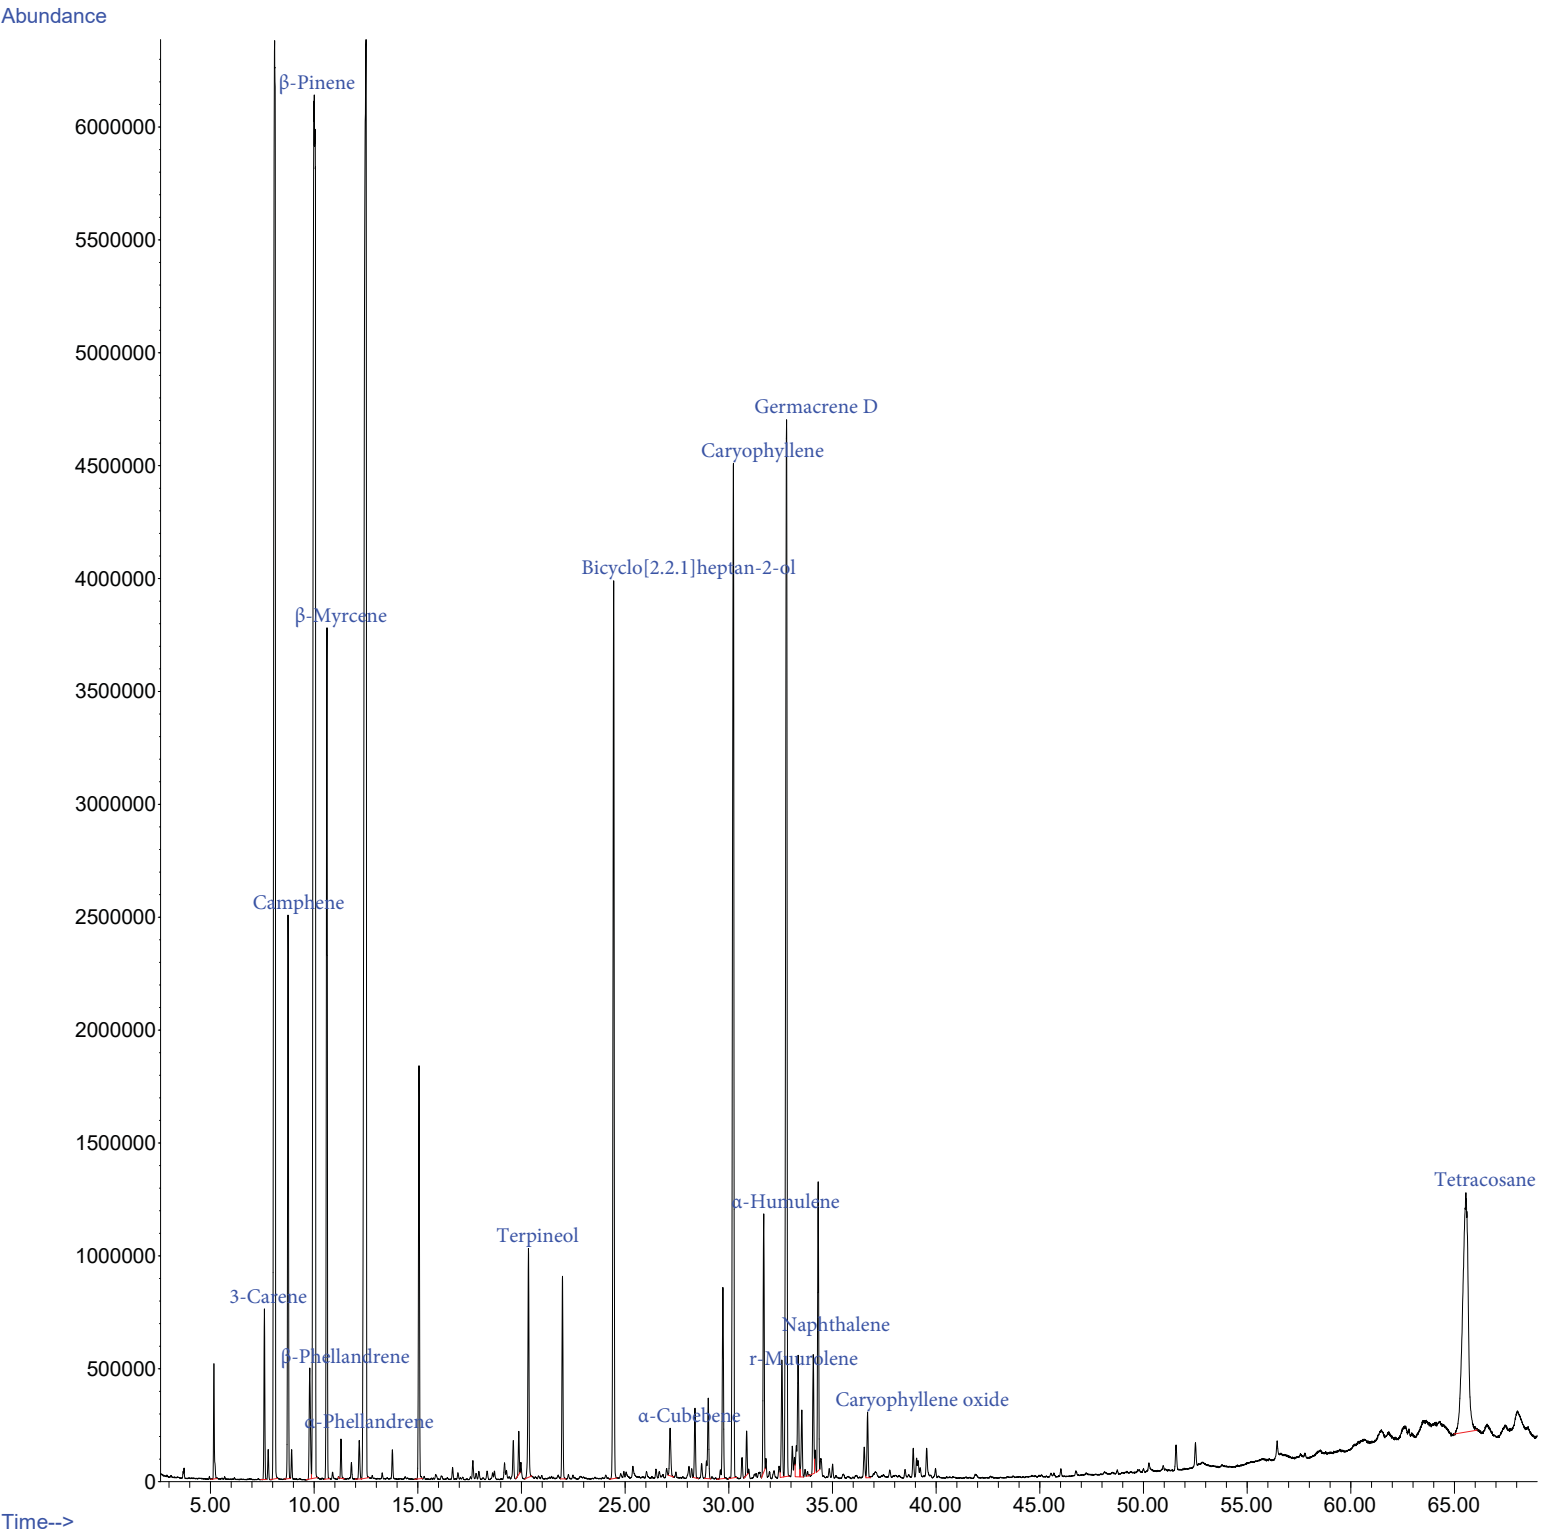

## Abundance

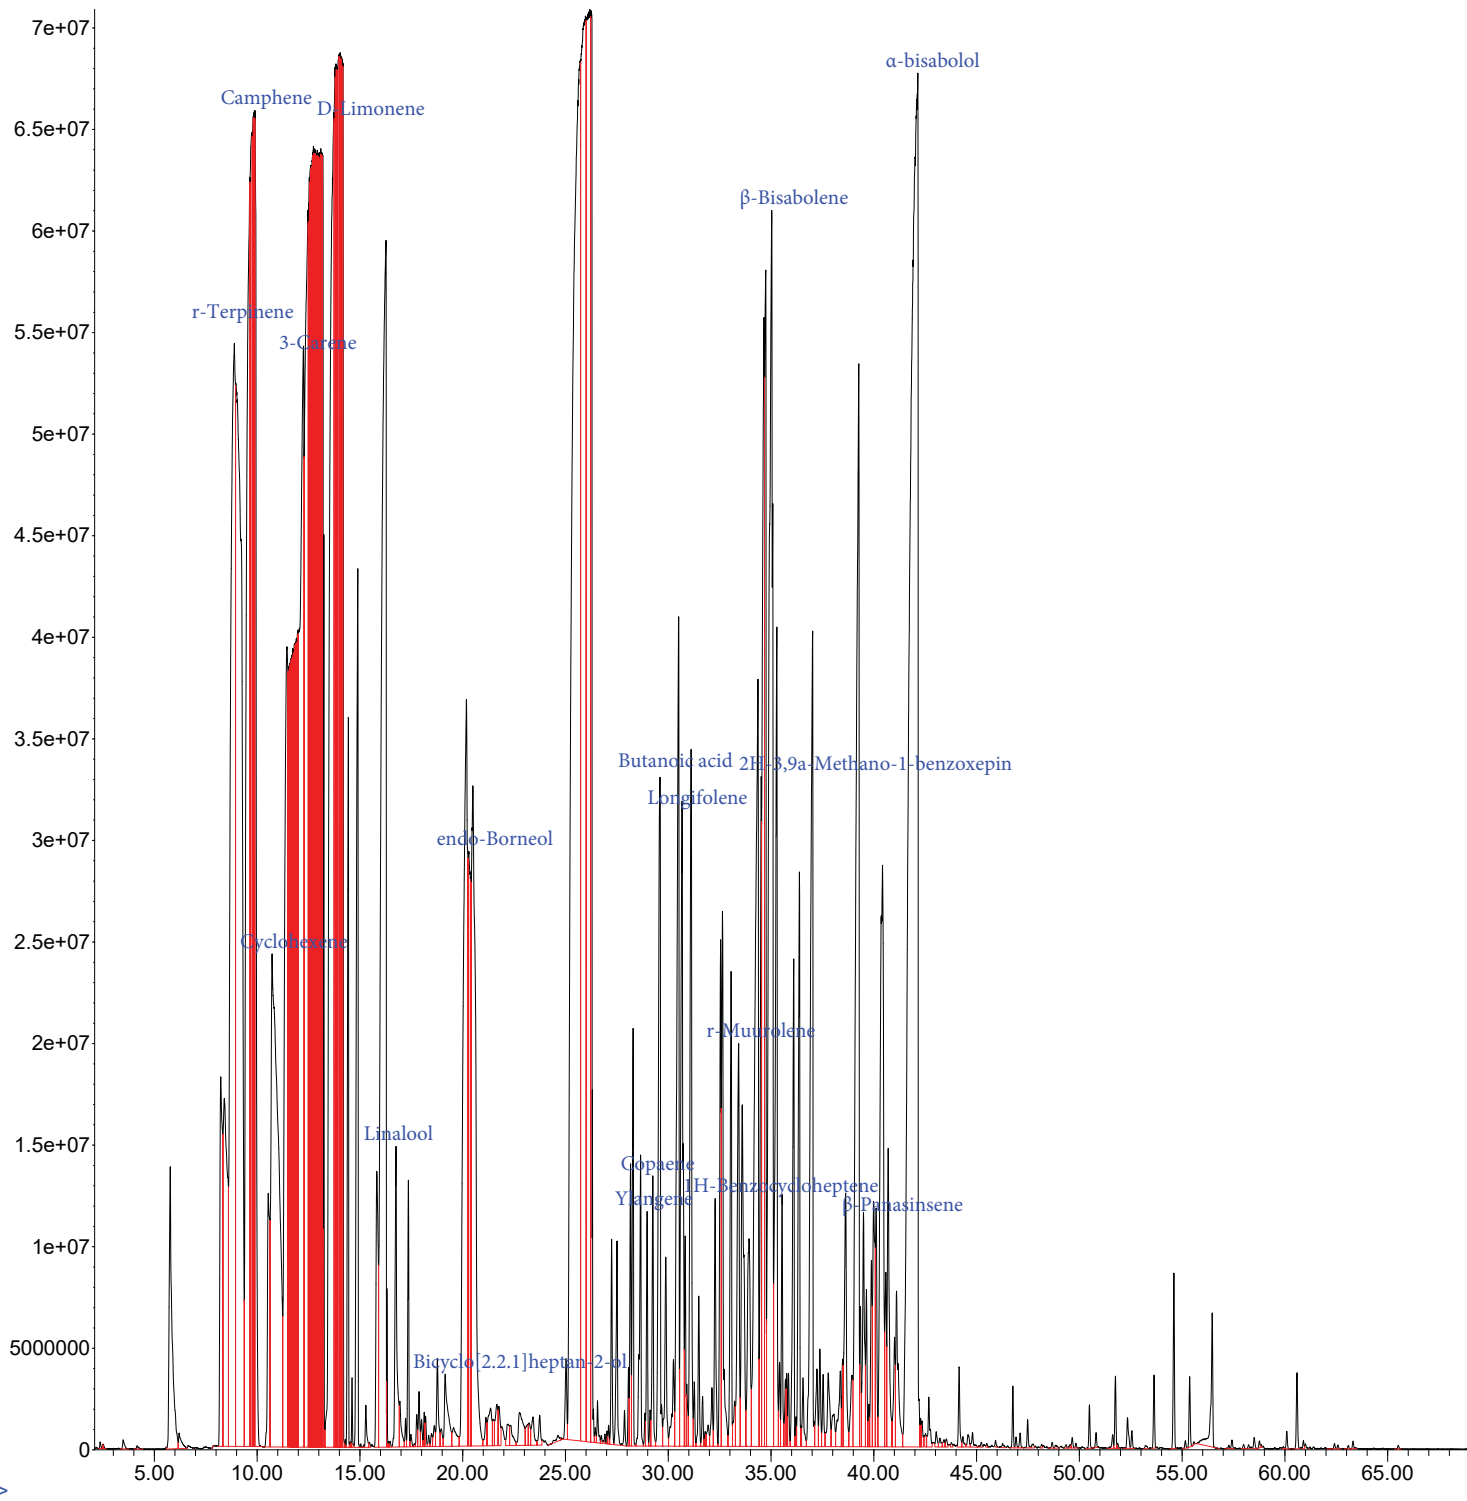

5. Pinus koraiensis / Spring

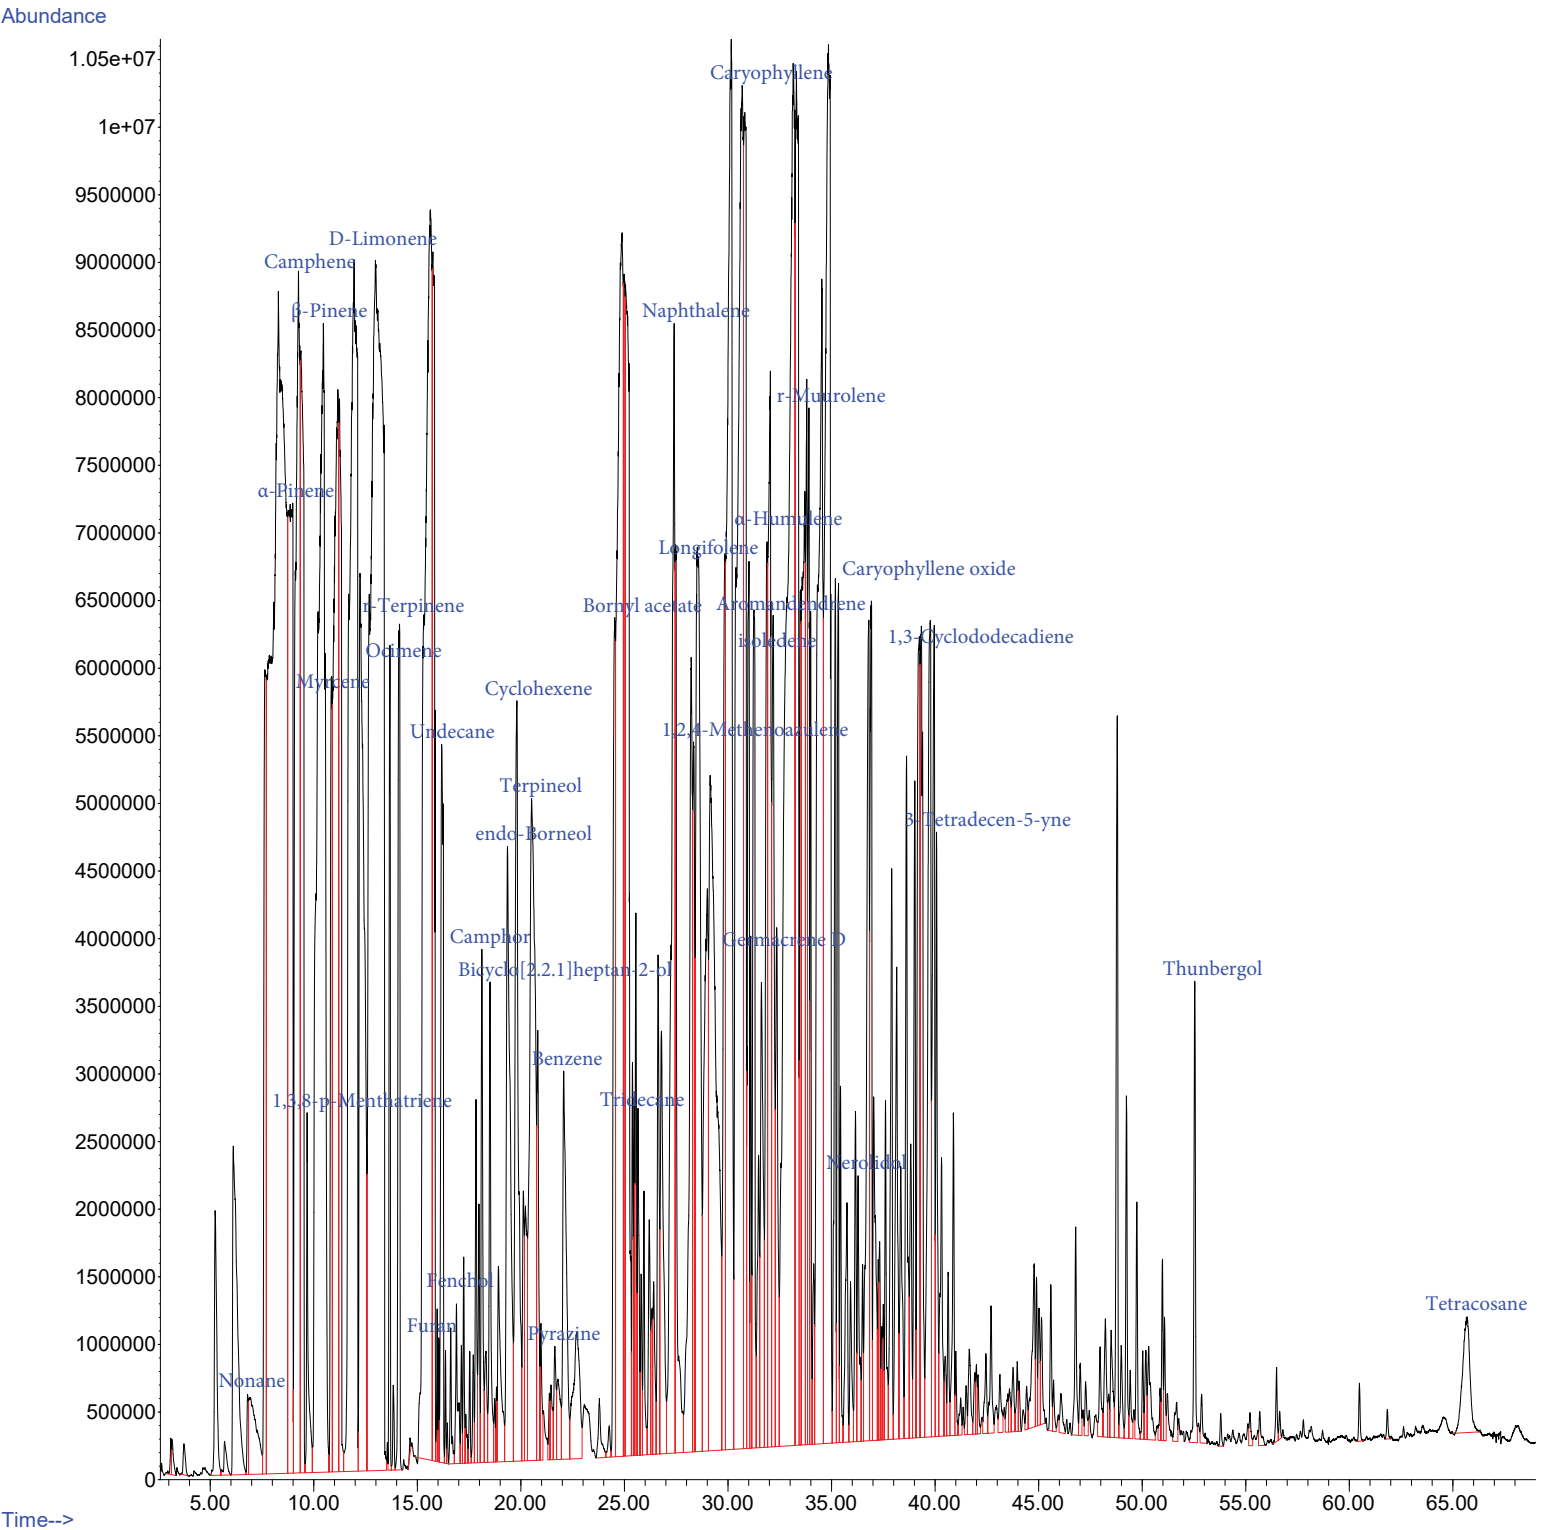

6. *Pinus koraiensis* / Summer

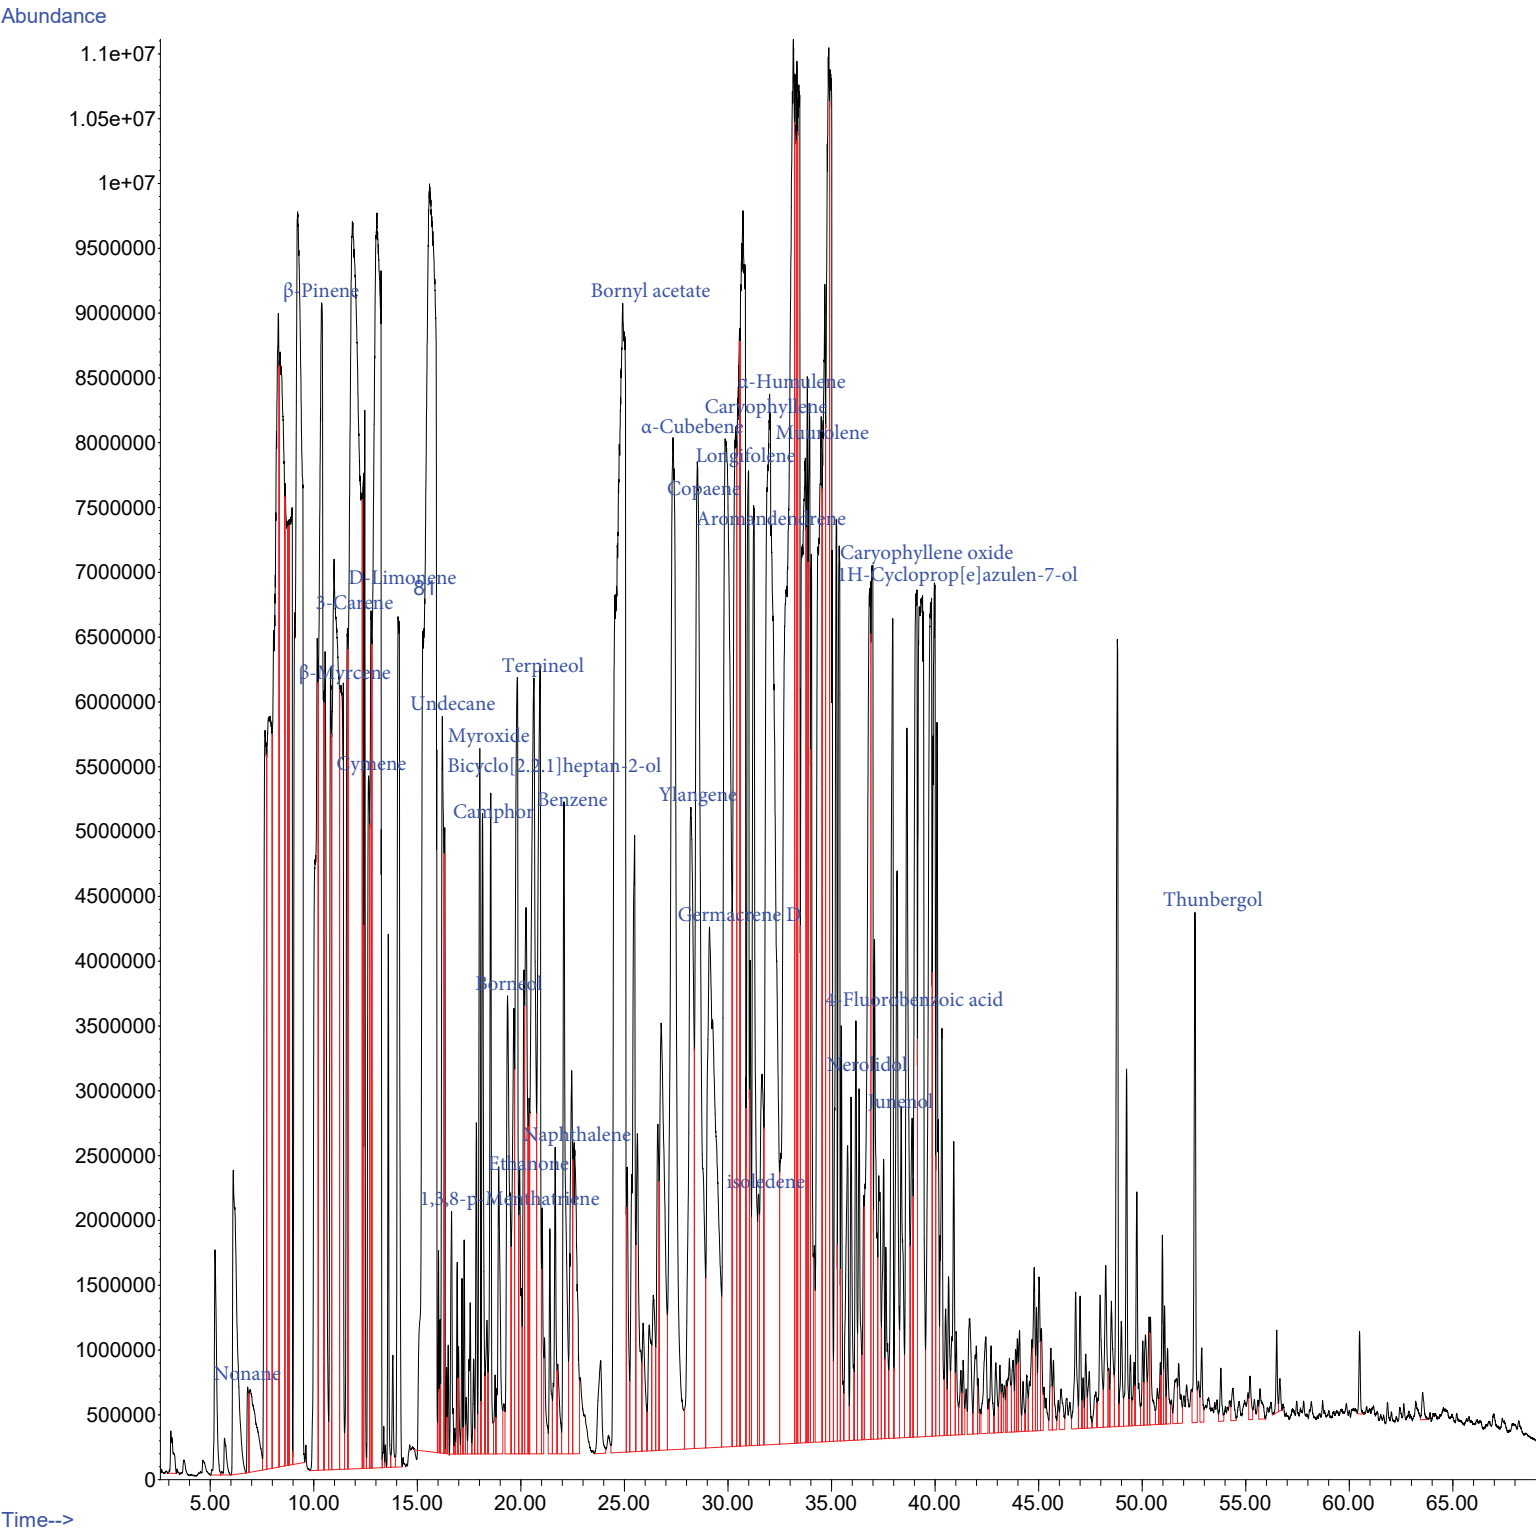



7. Pinus koraiensis / Autumn

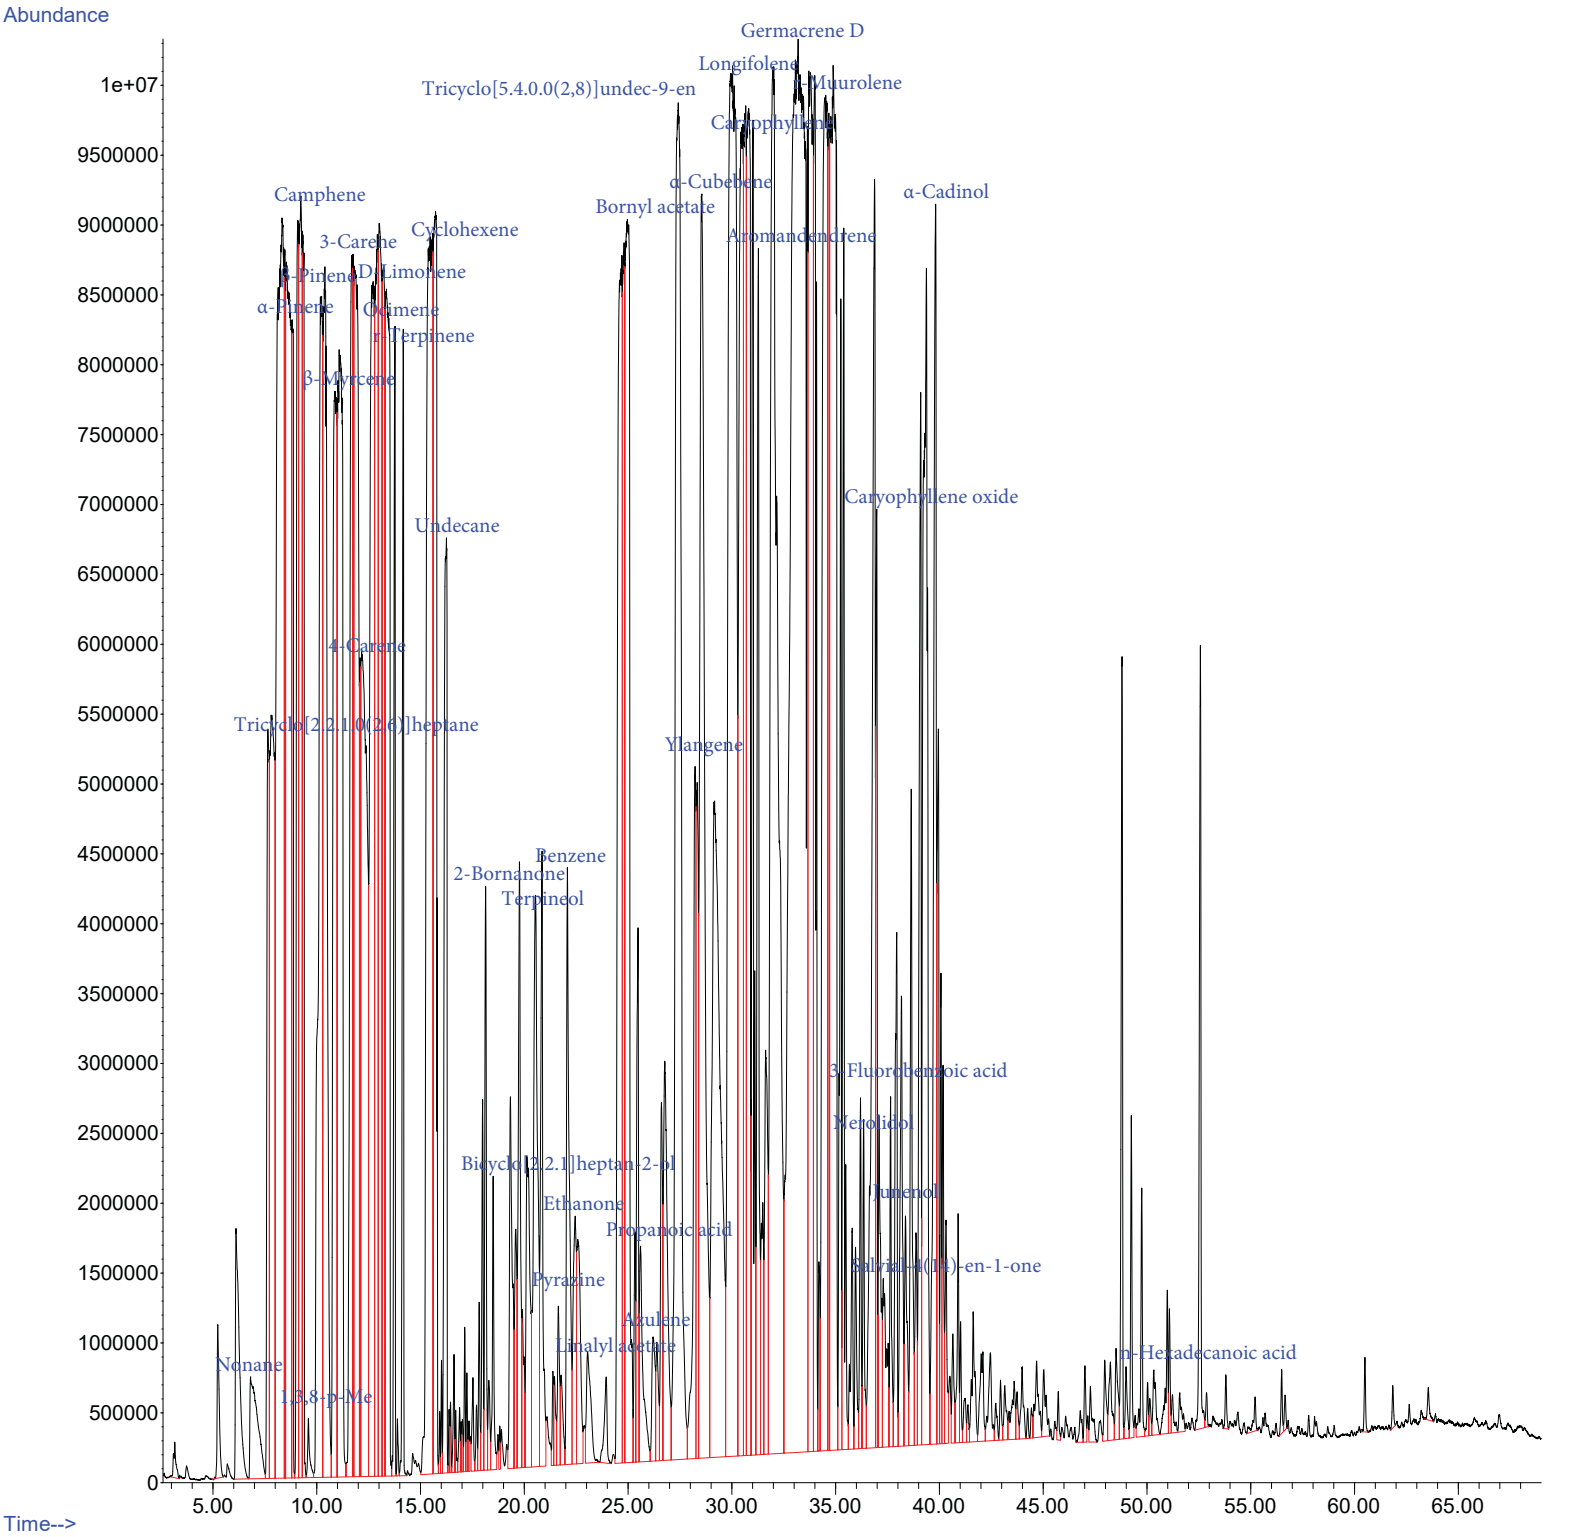

8. *Pinus koraiensis* / Winter

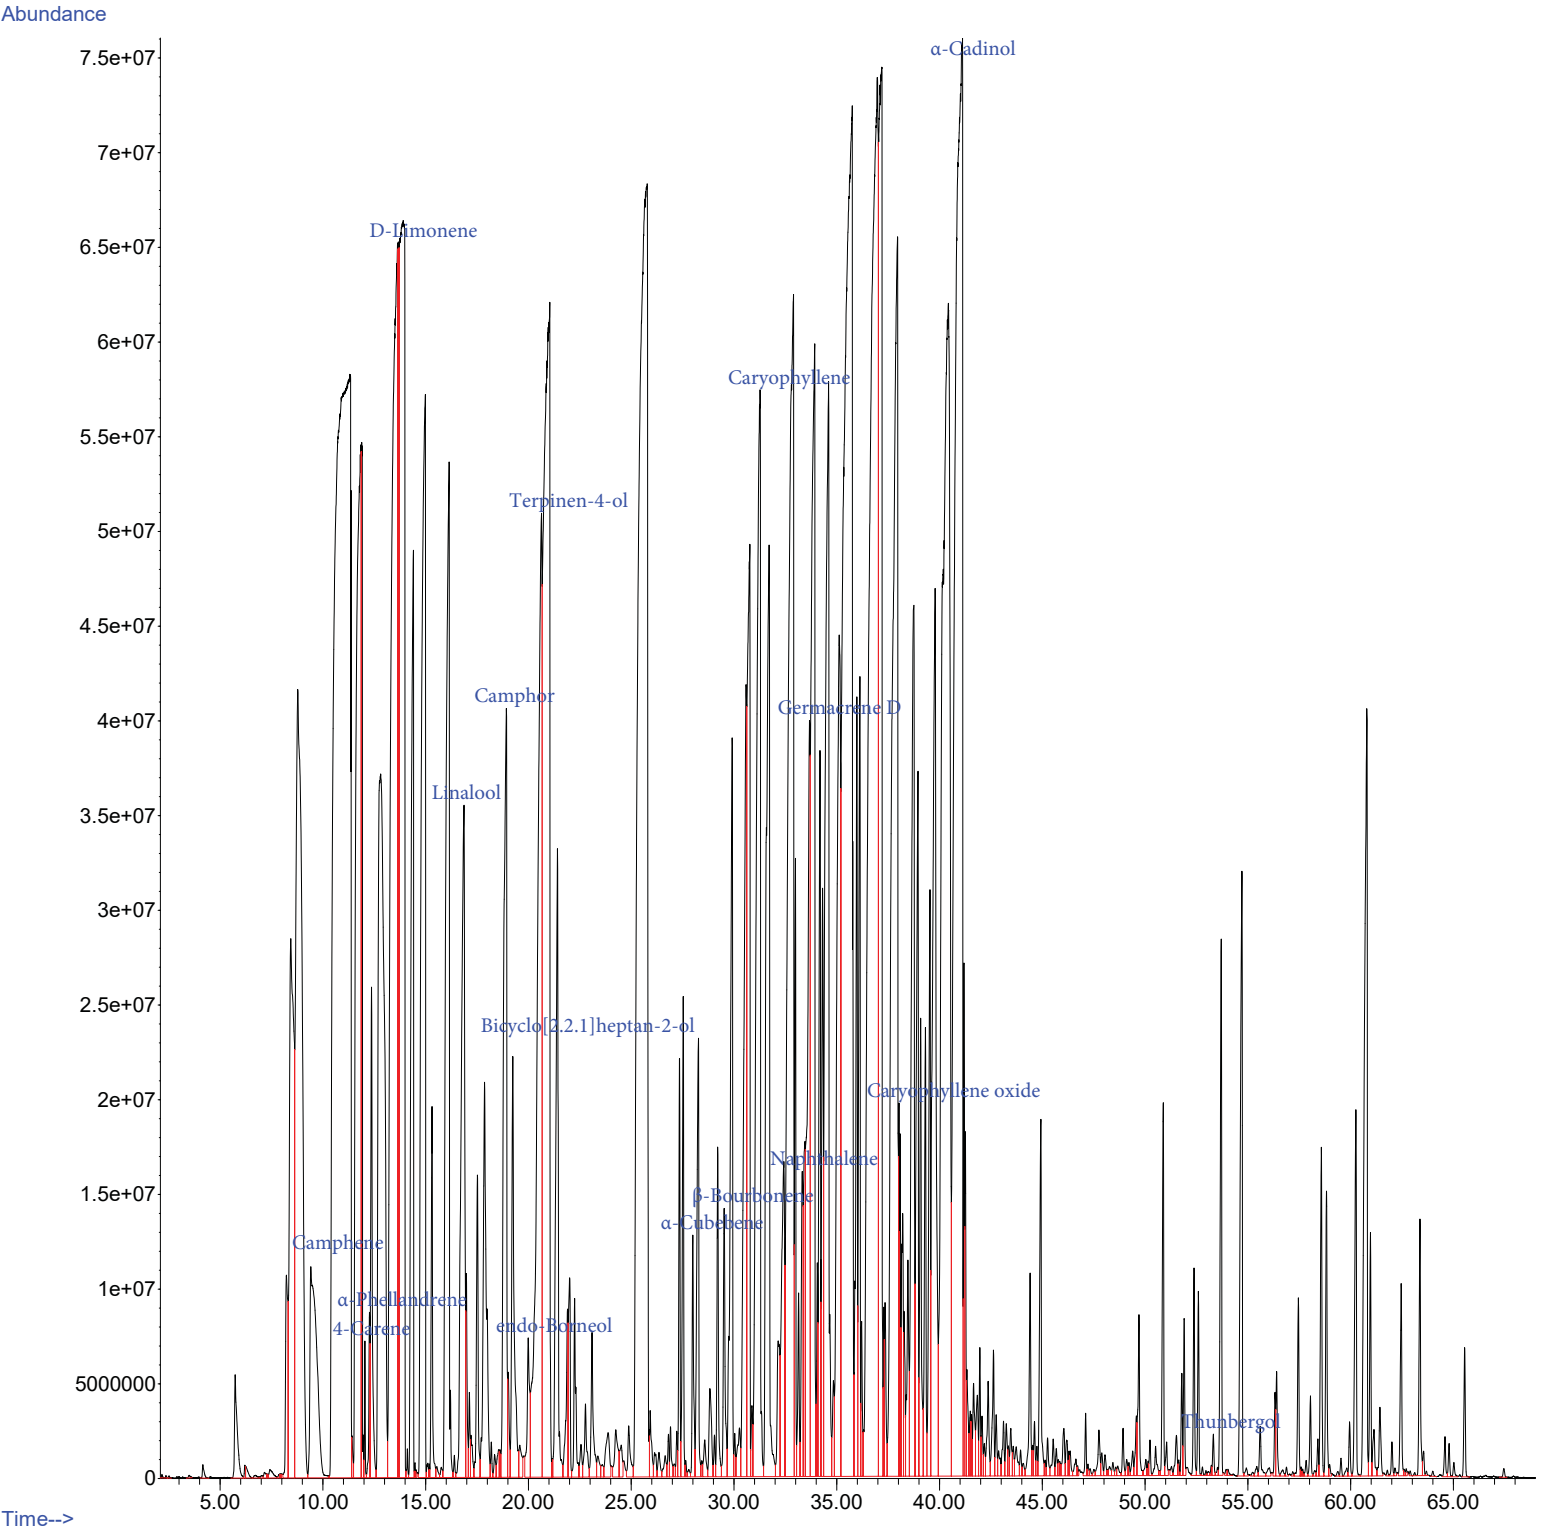

9. *Abies holophylla* / Spring

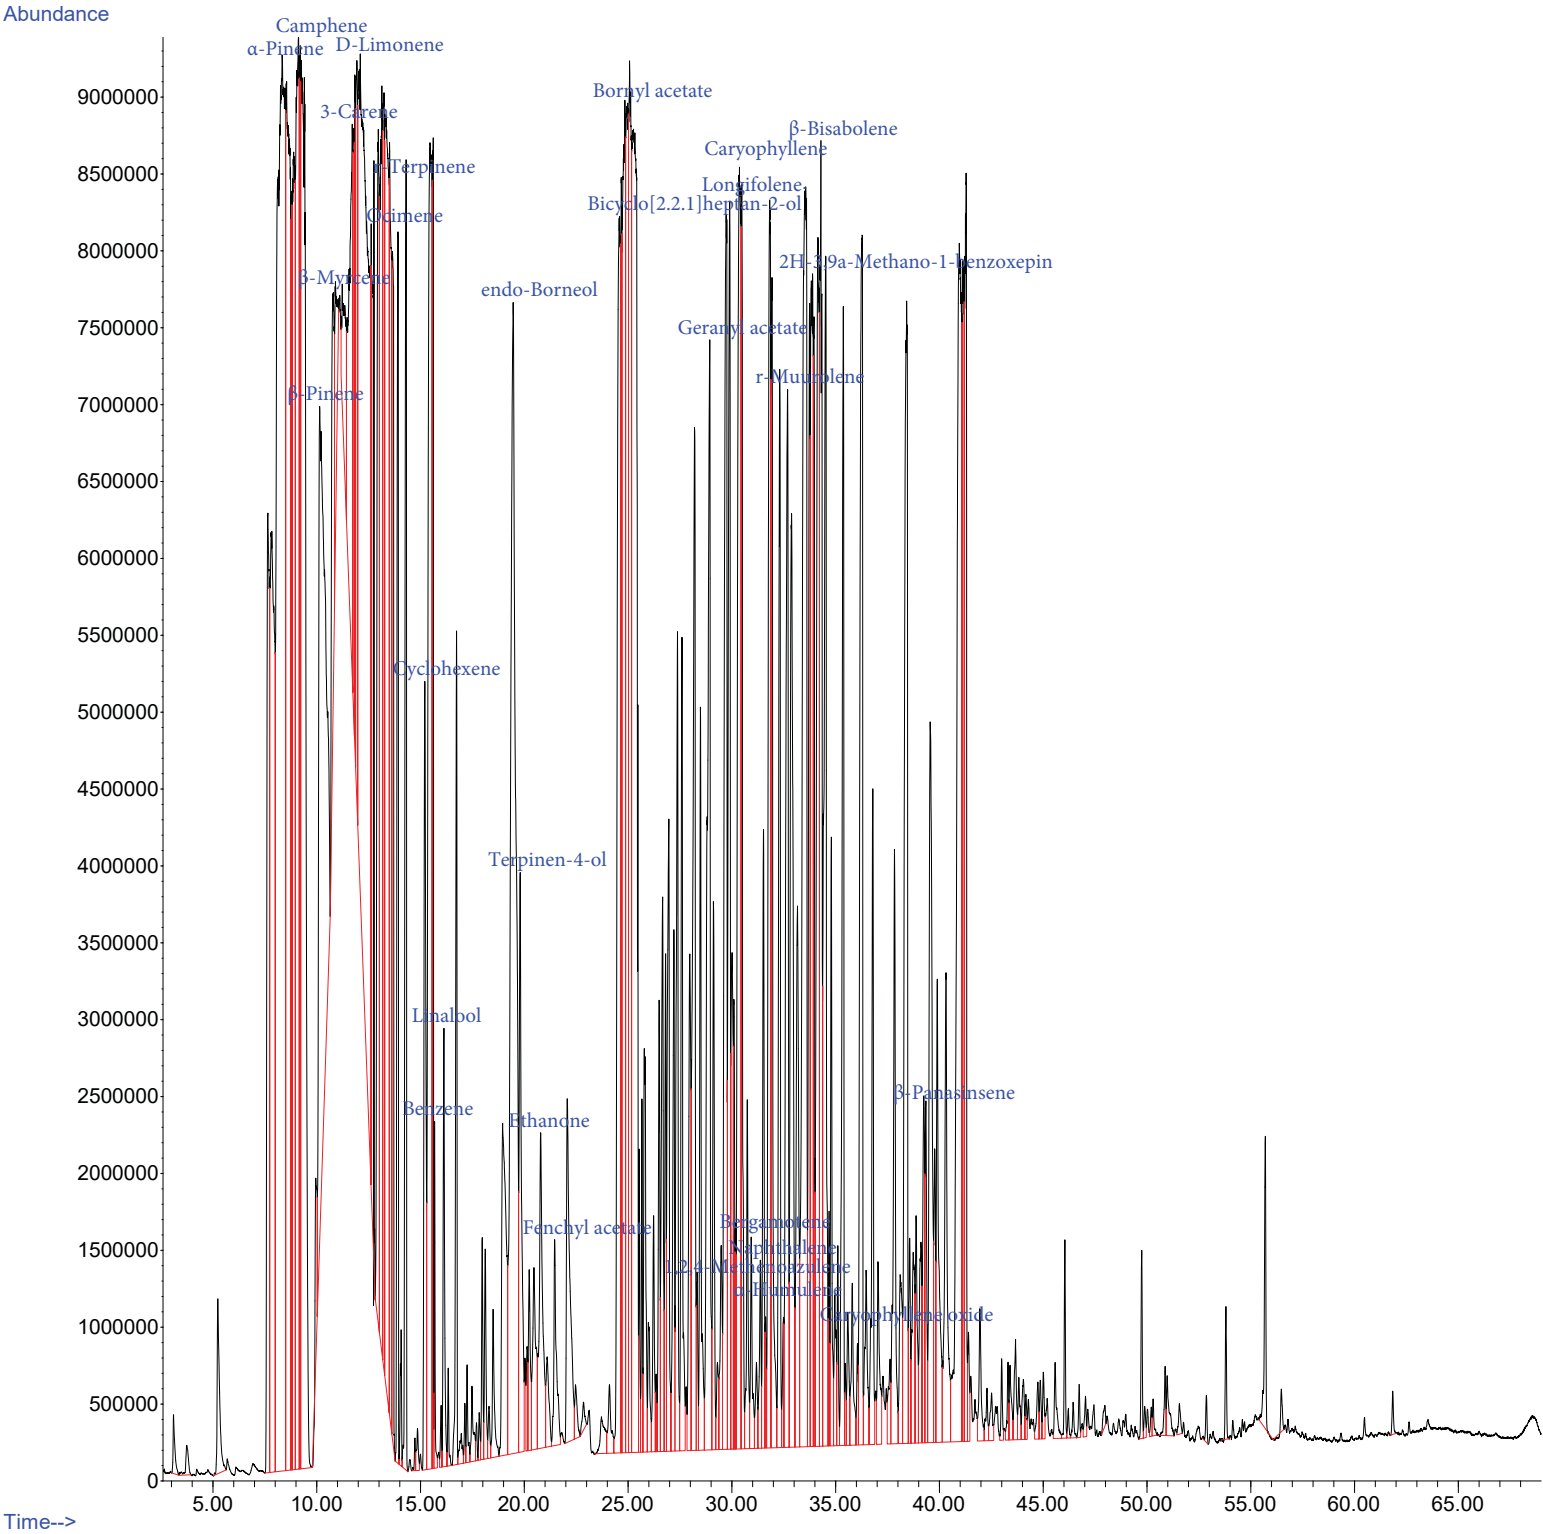

10. *Abies holophylla* / Summer

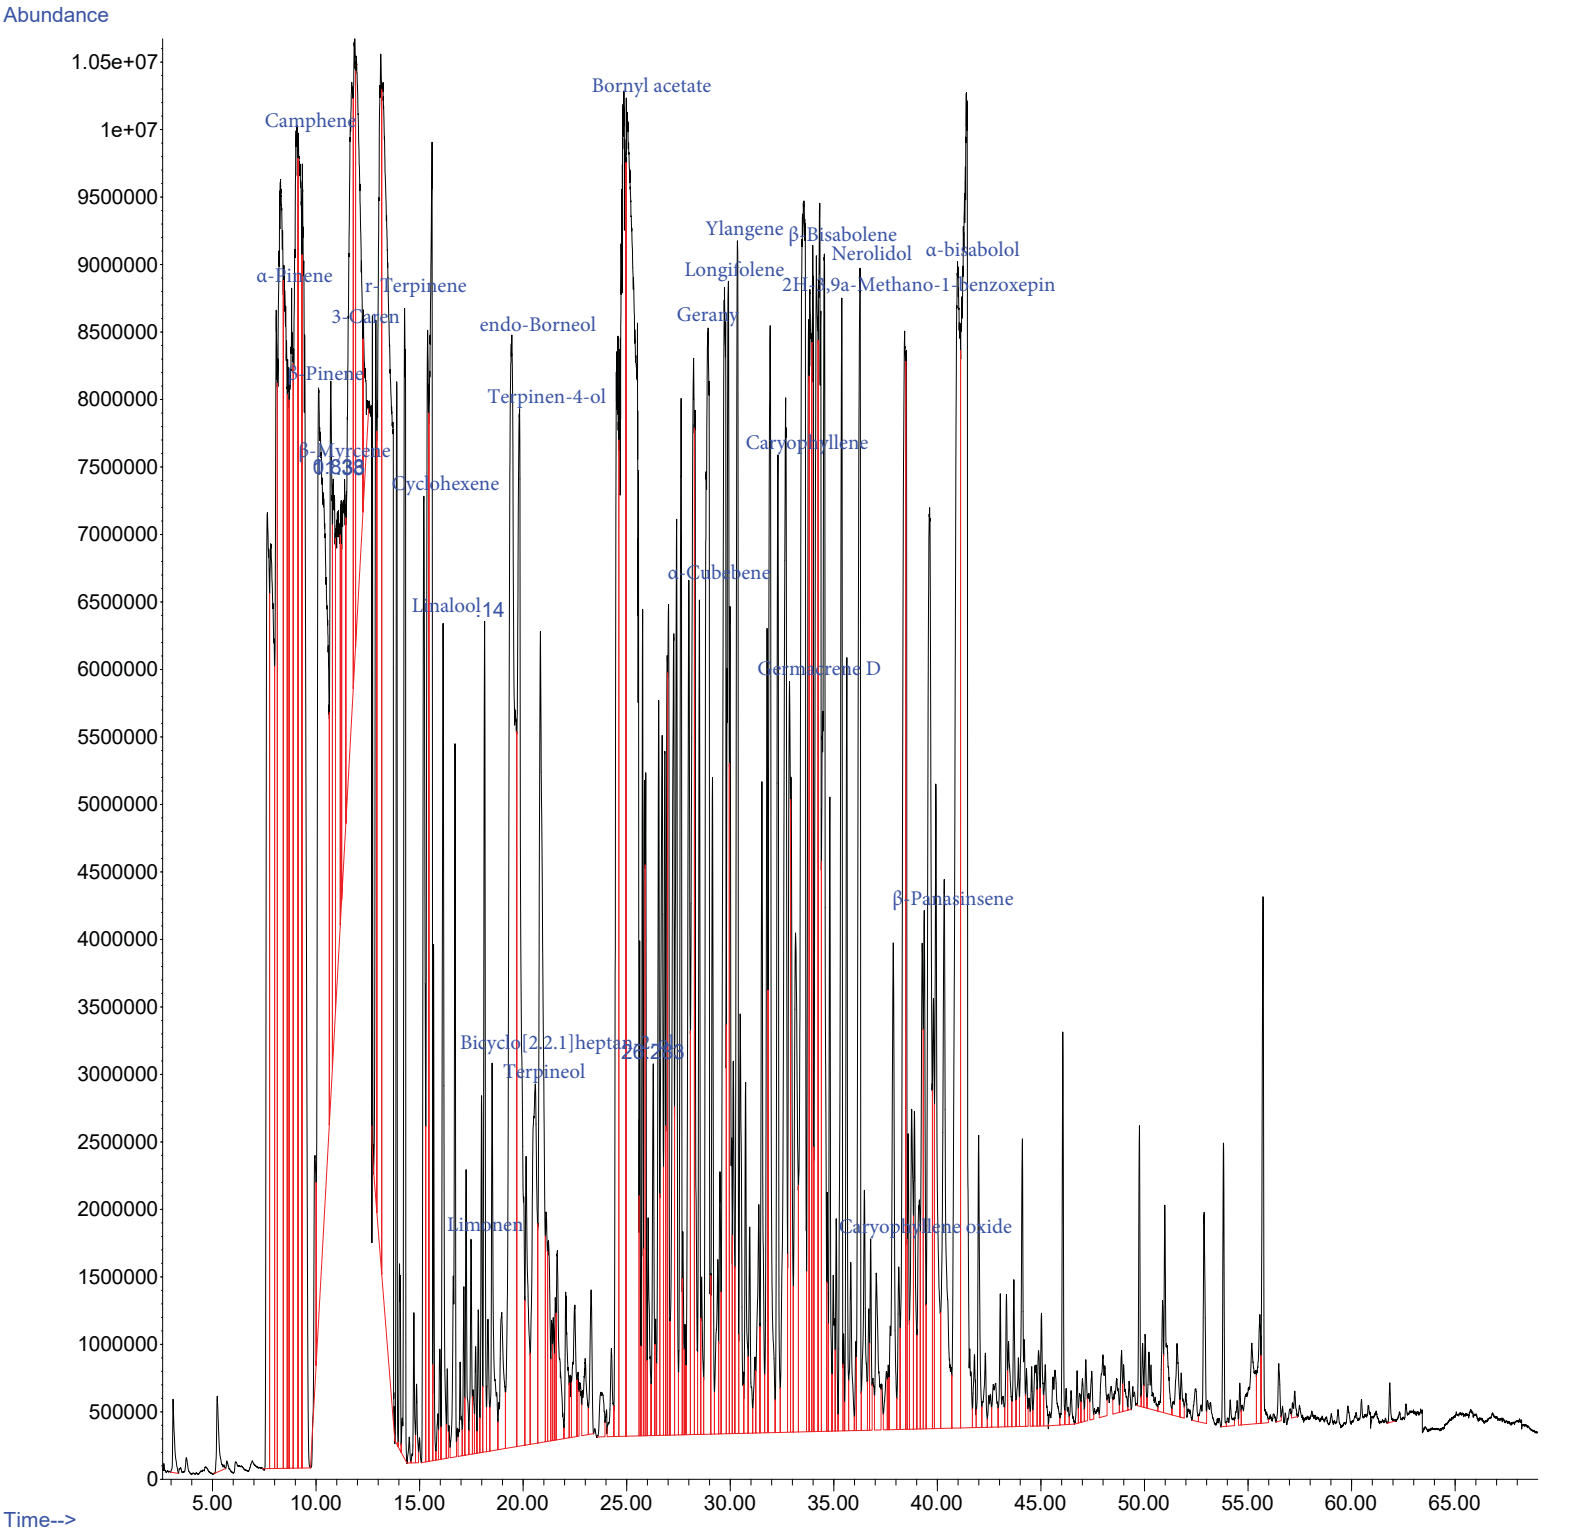

11. *Abies holophylla* / Autumn

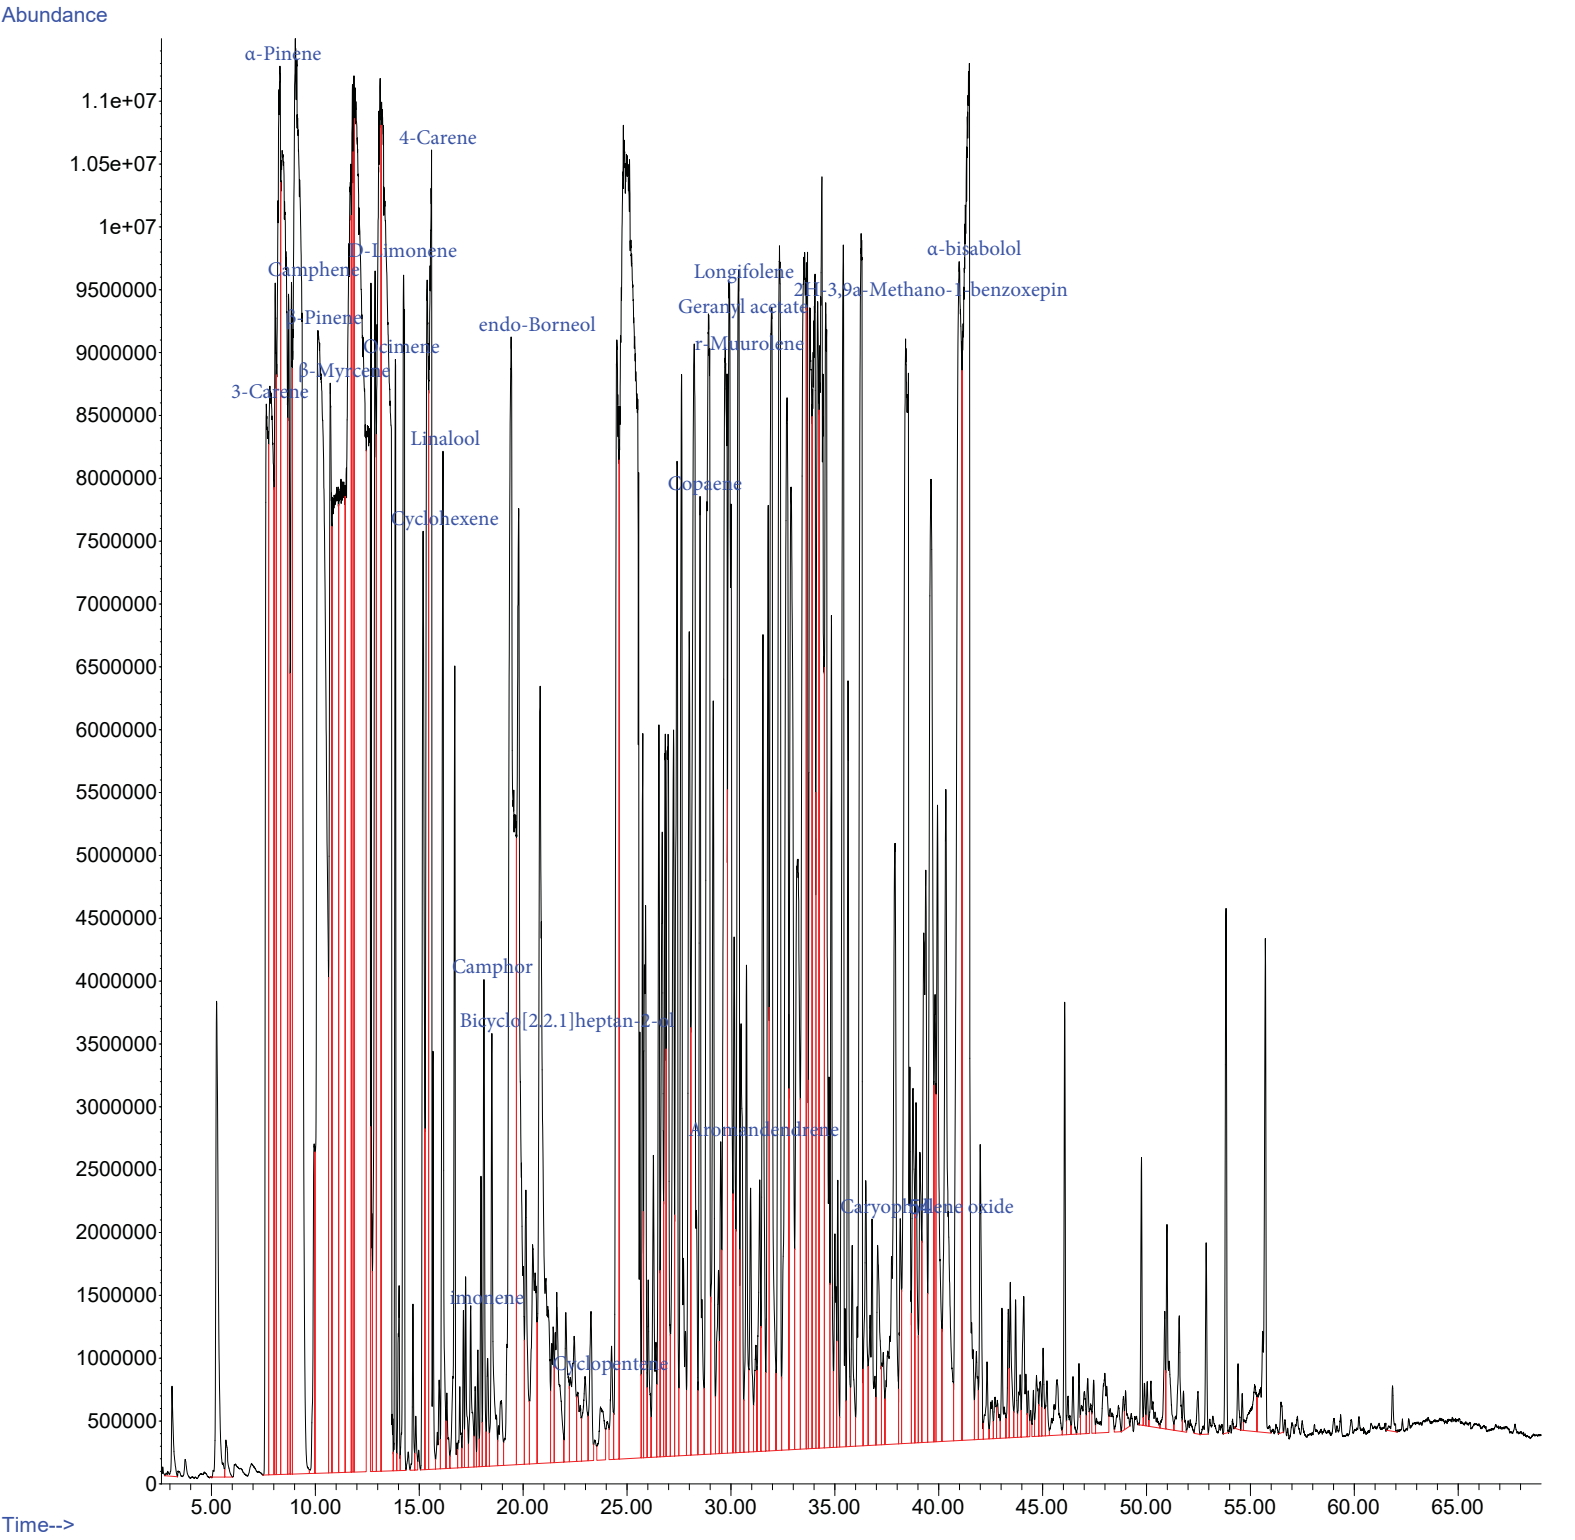

12. *Abies holophylla* / Winter

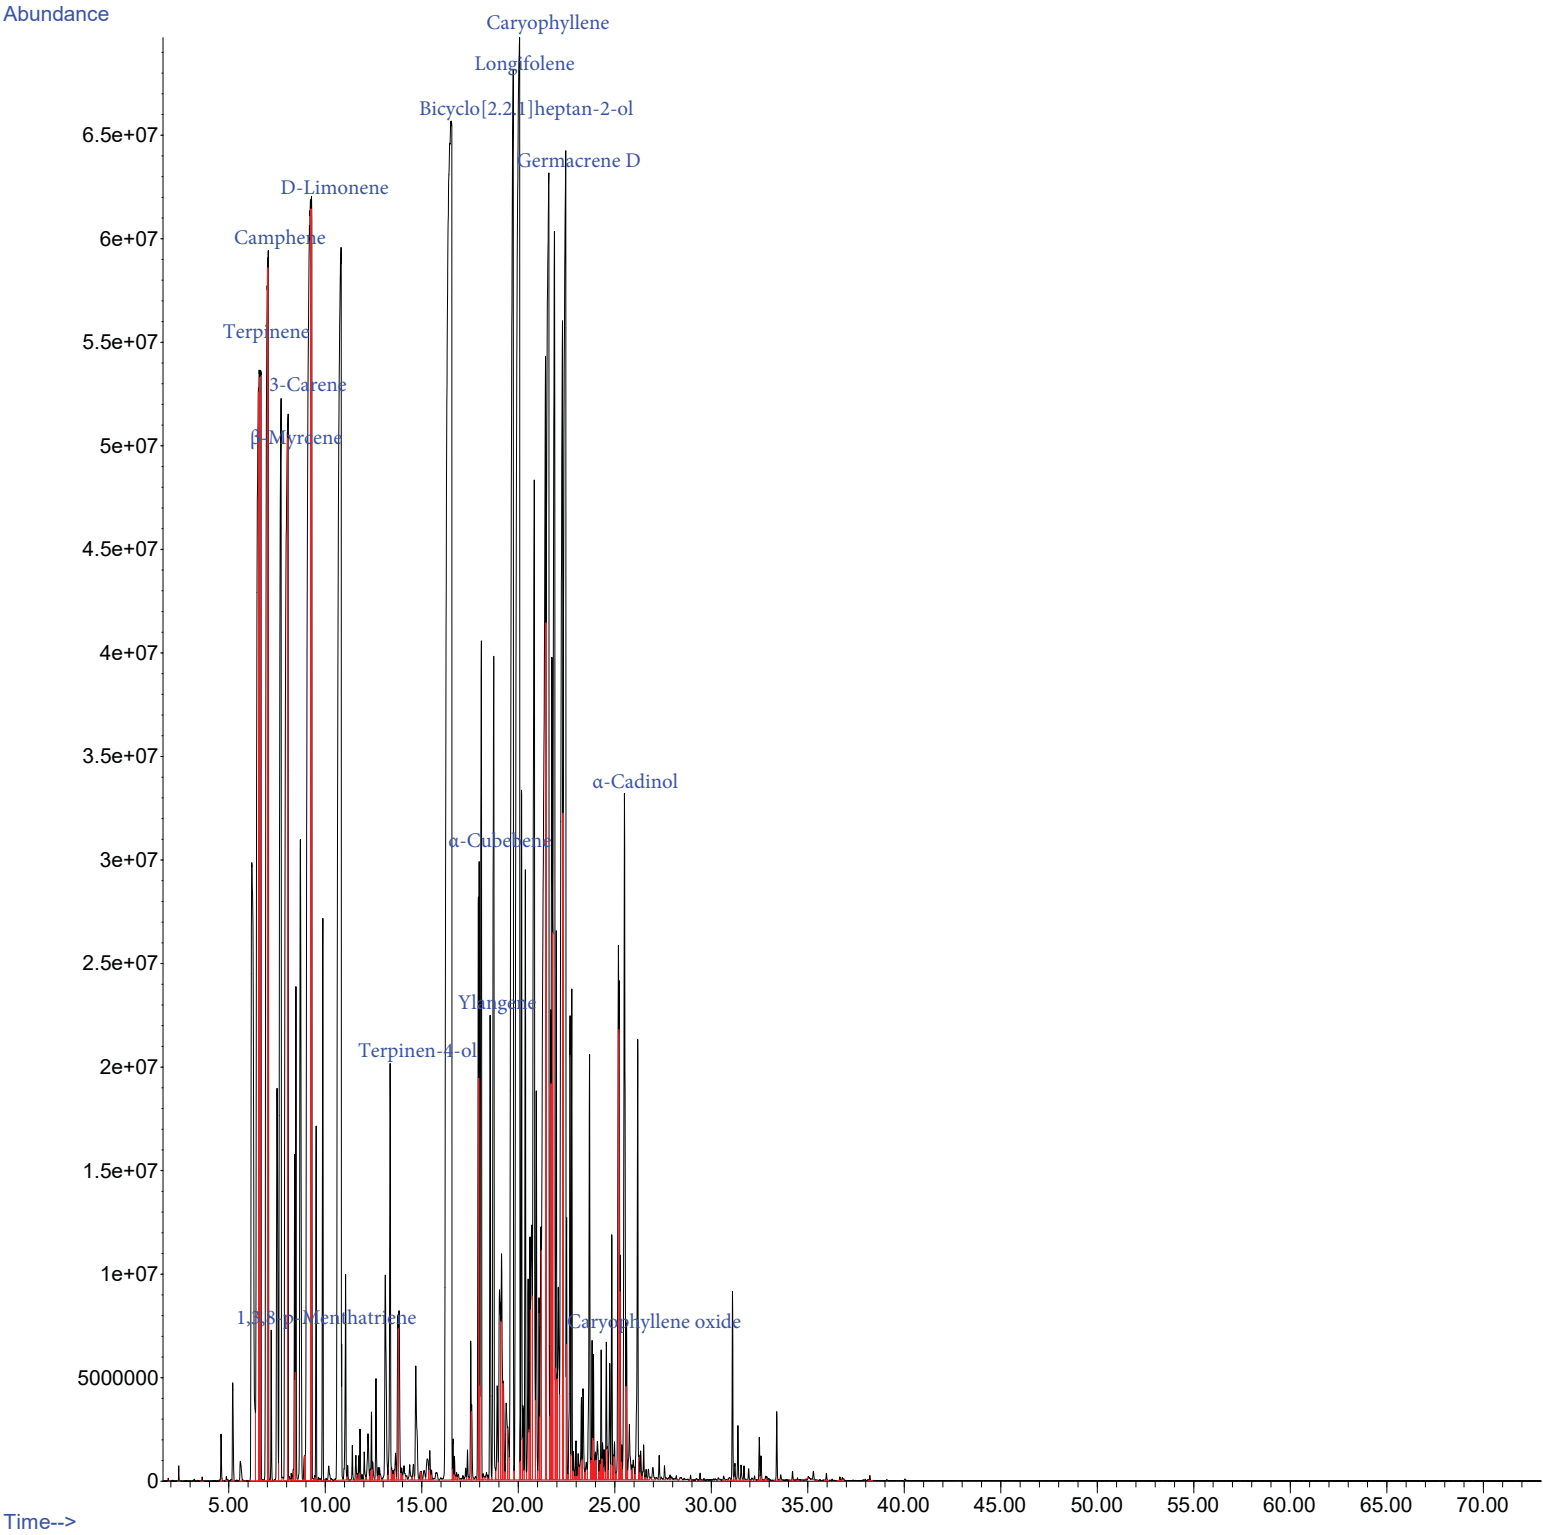

13. *Juniperus chinensis* / Spring

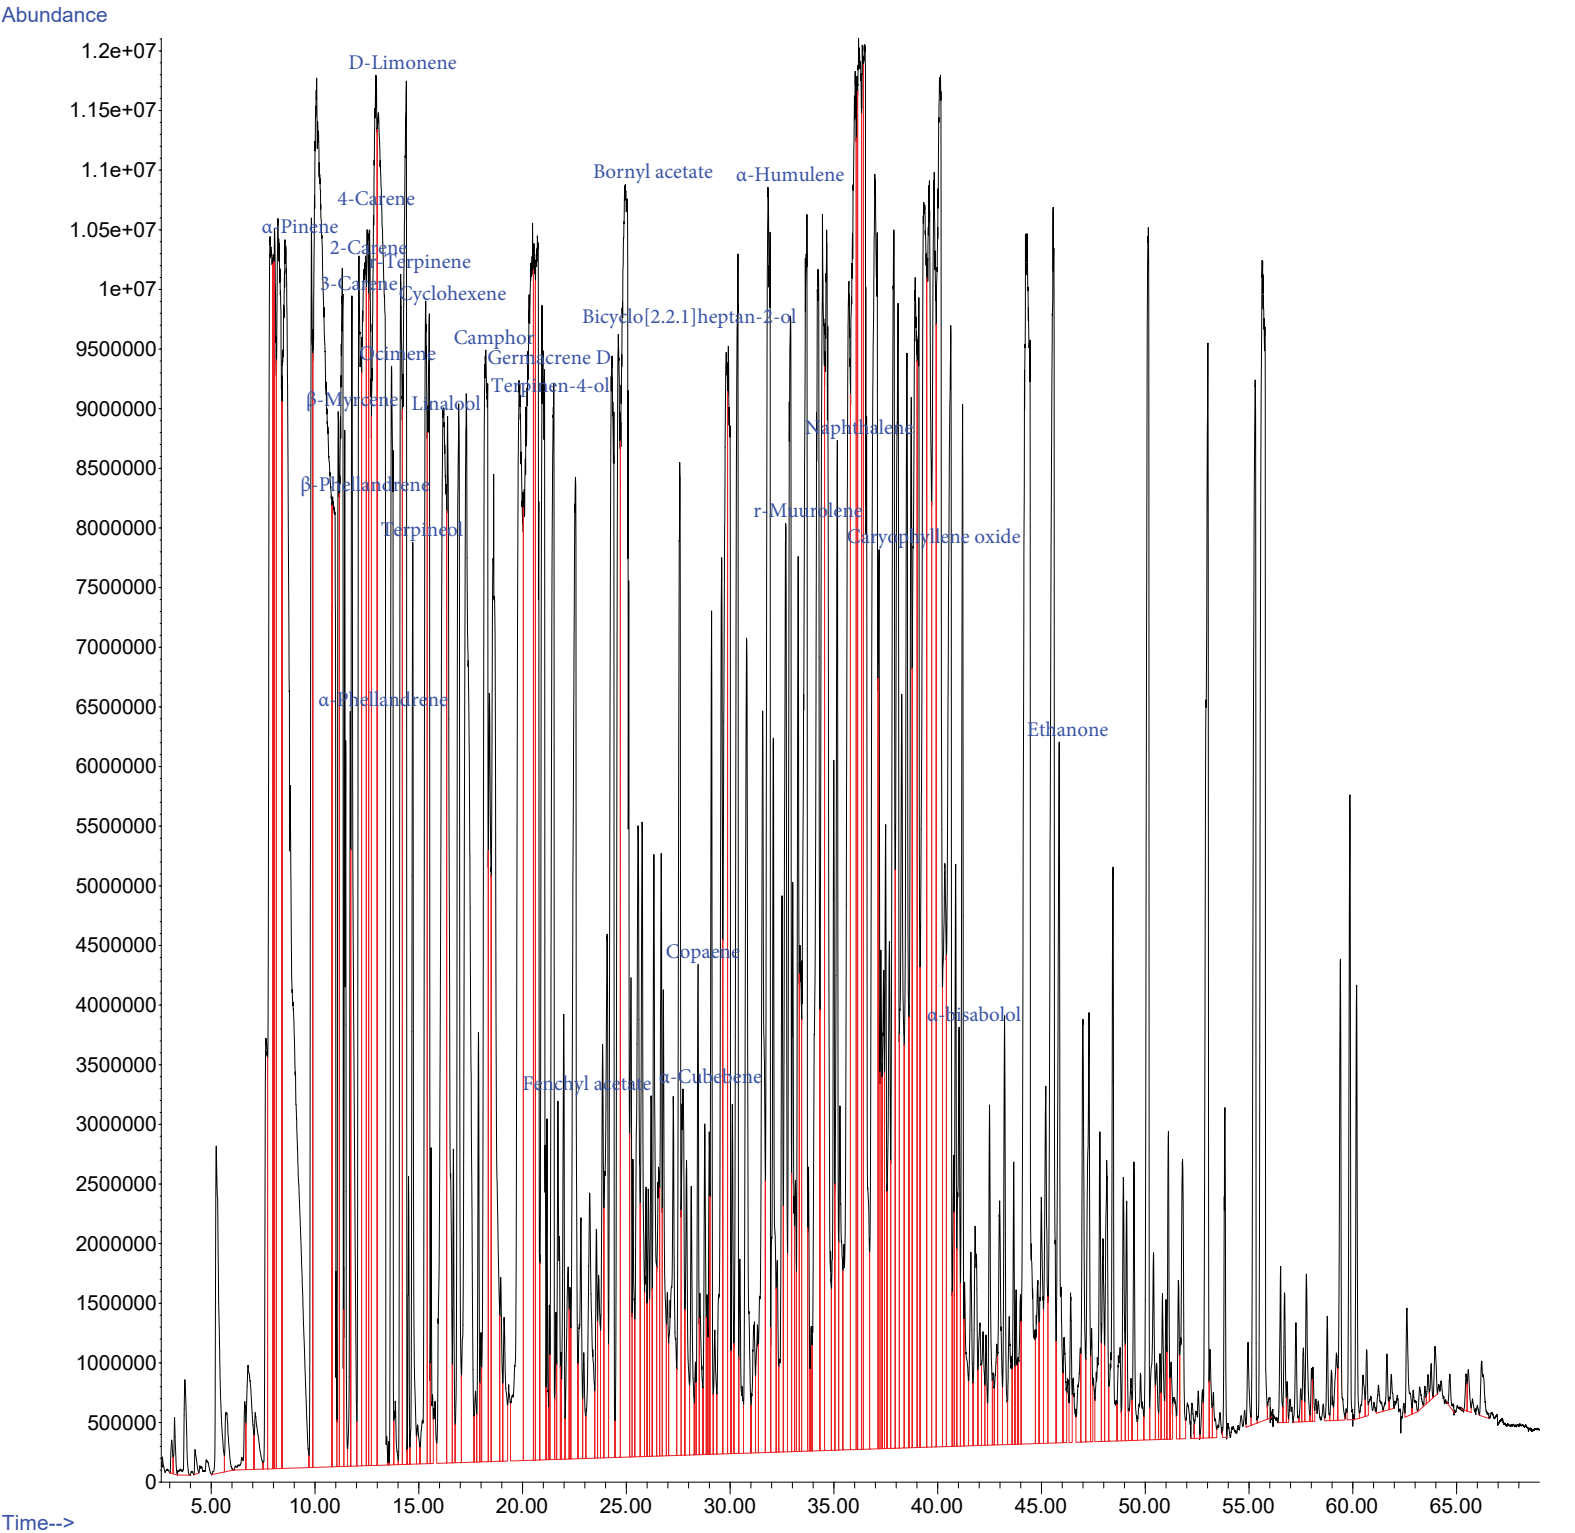

14. *Juniperus chinensis* / Summer

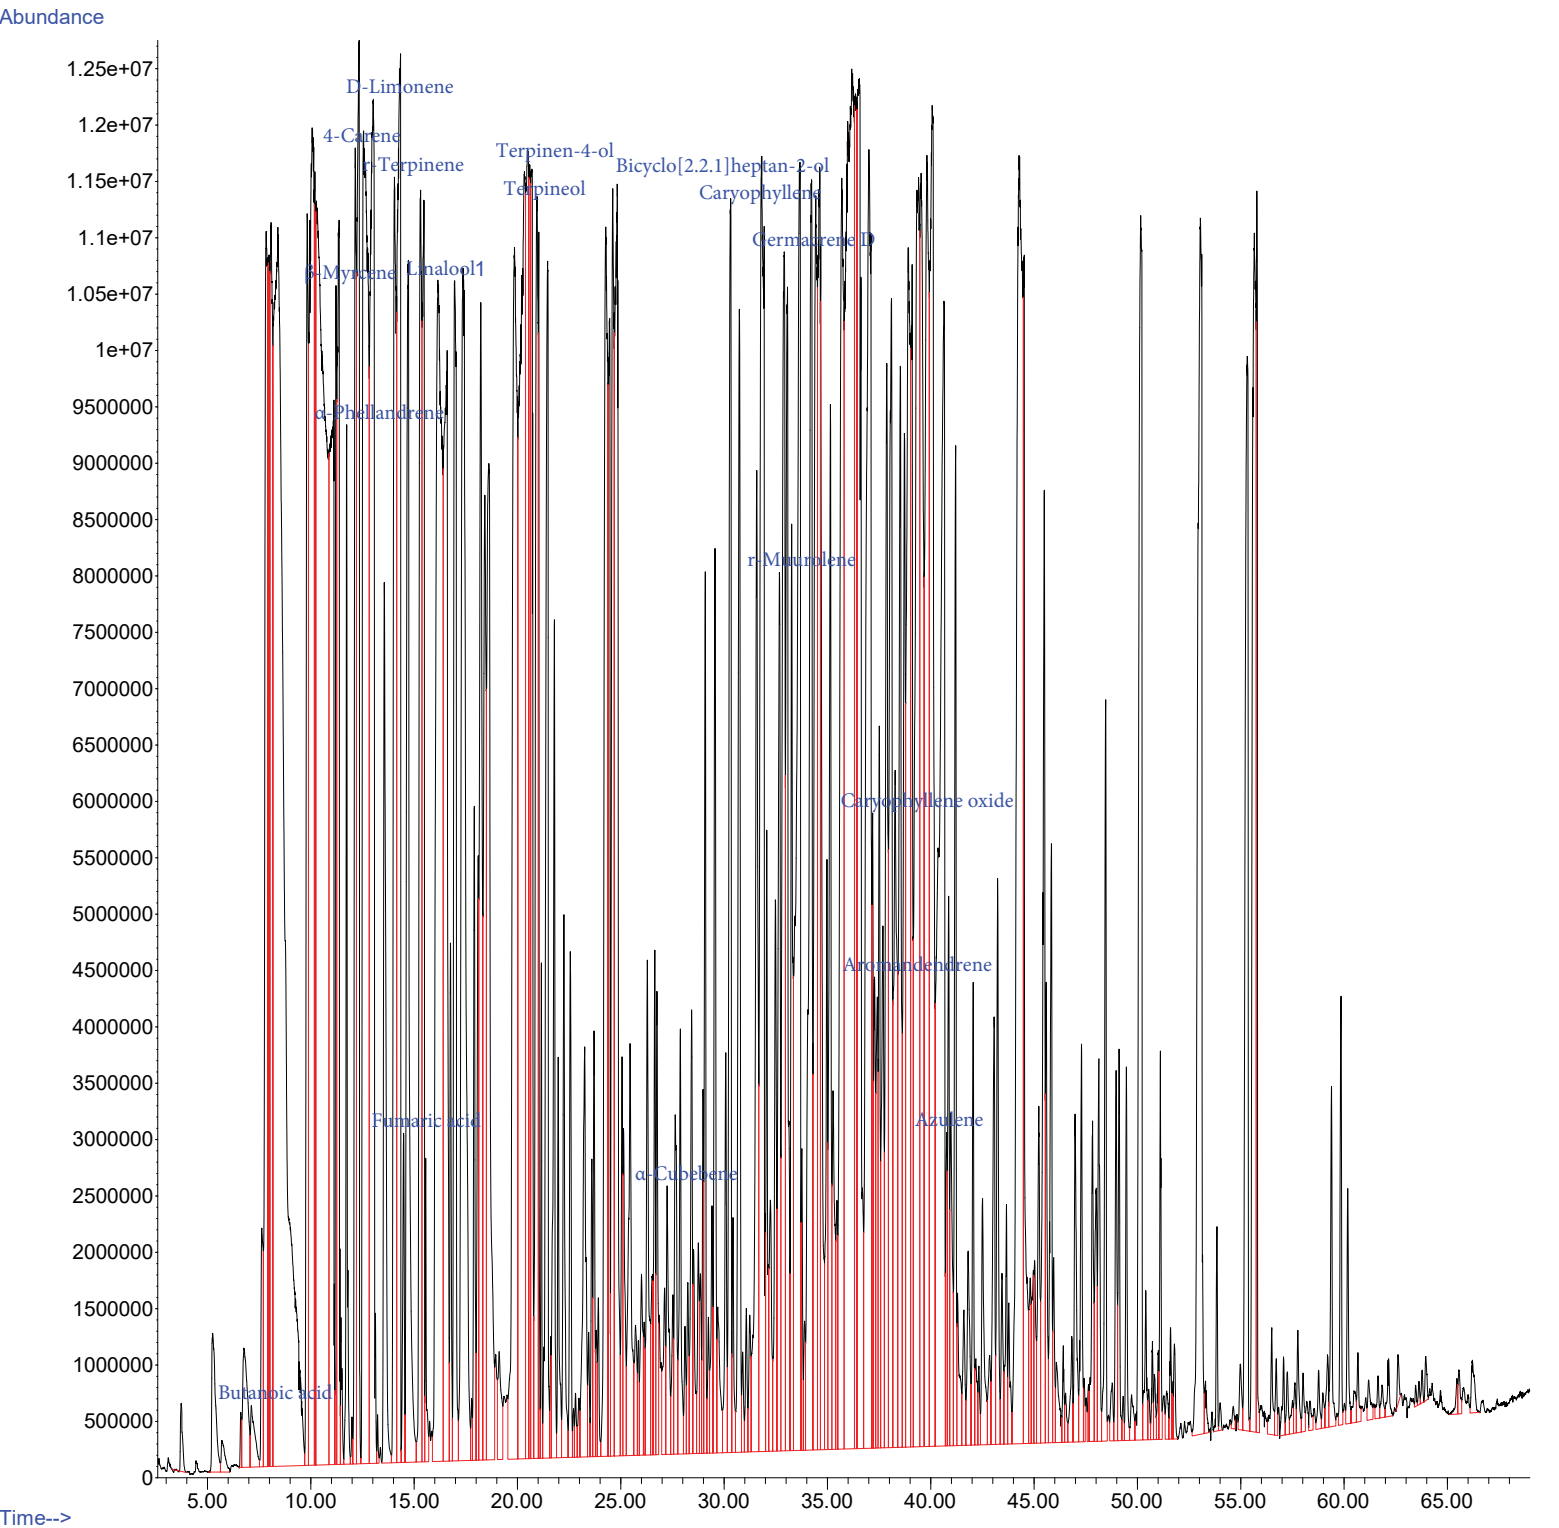



15. *Juniperus chinensis* / Autumn

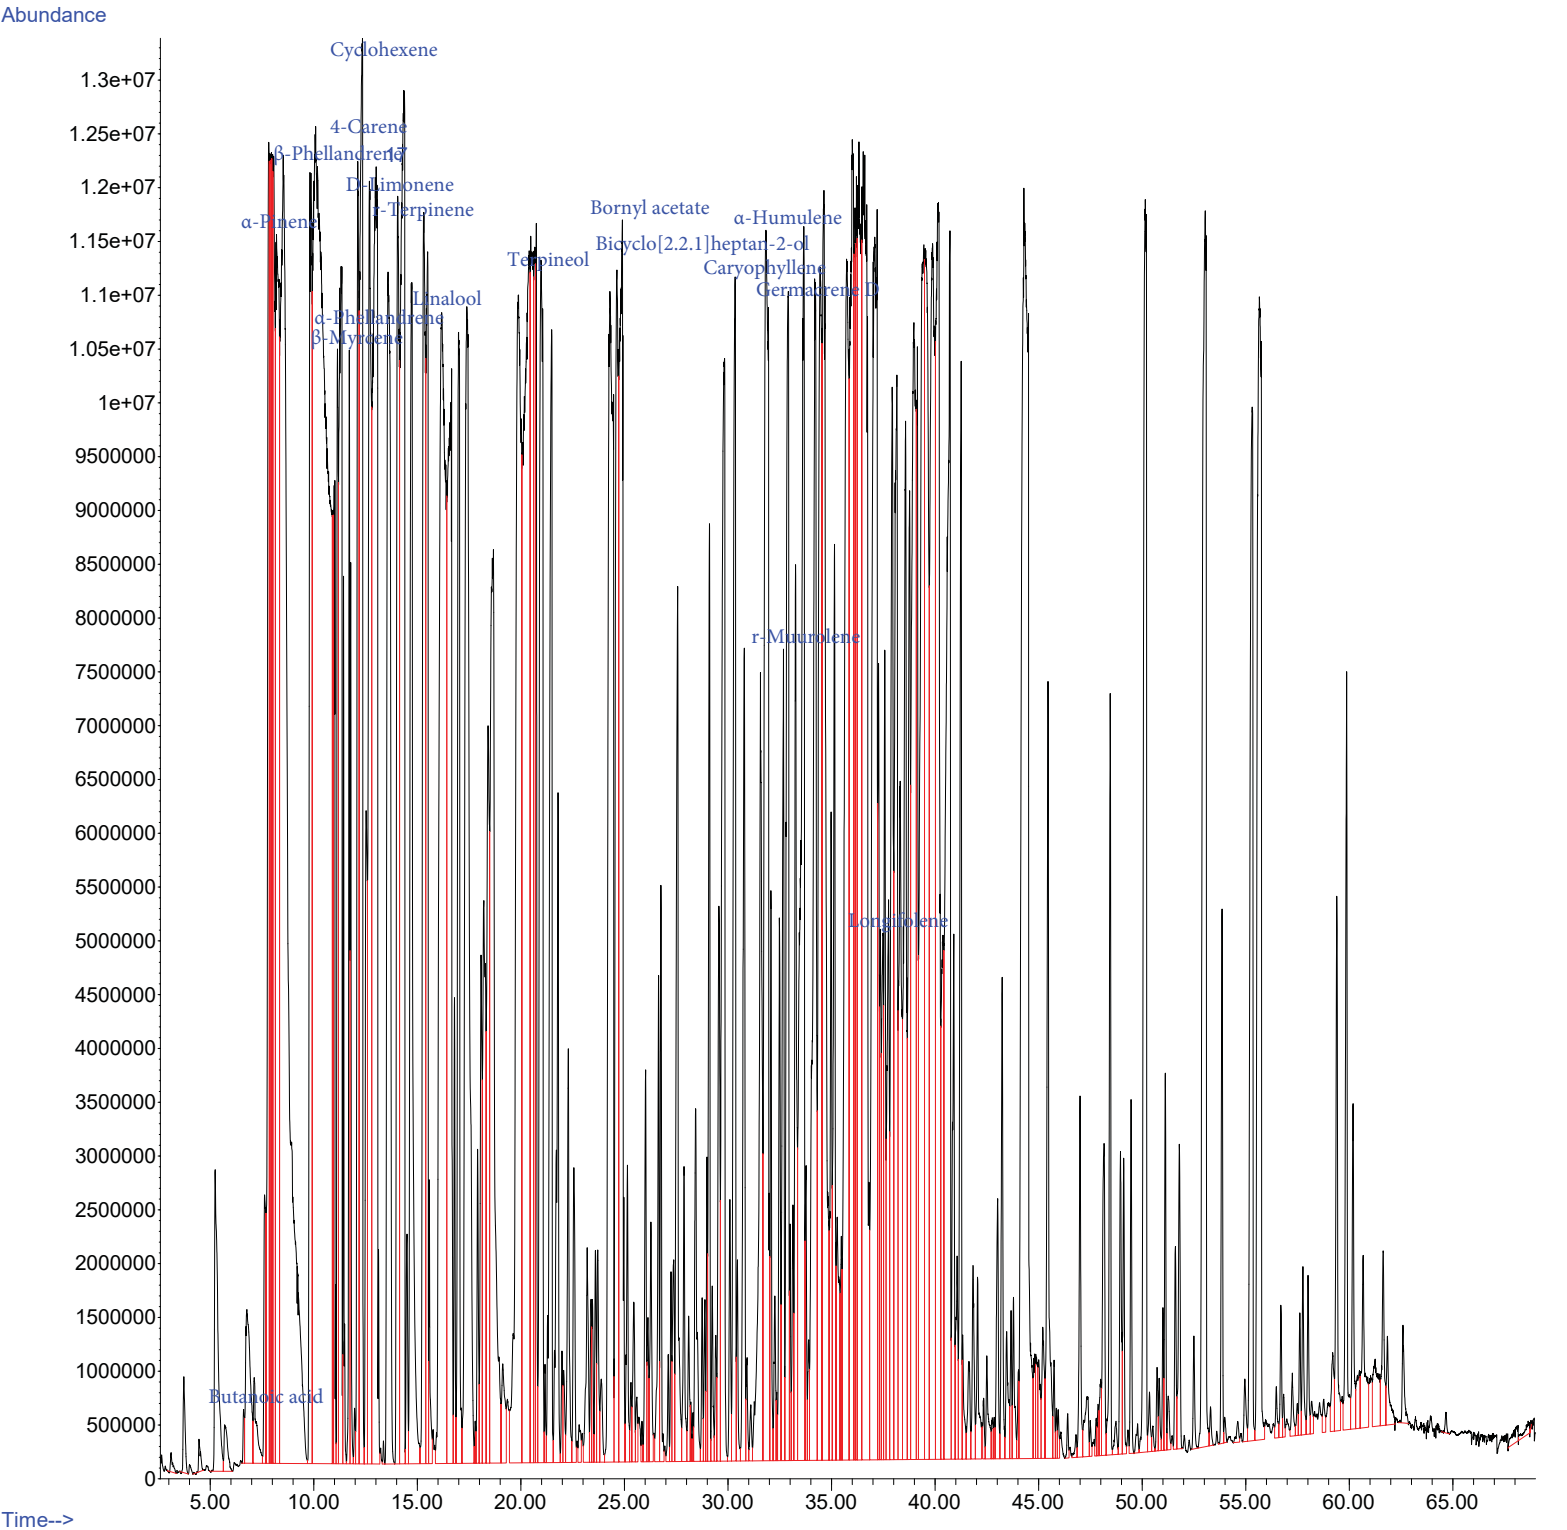

16. *Juniperus chinensis* / Winter

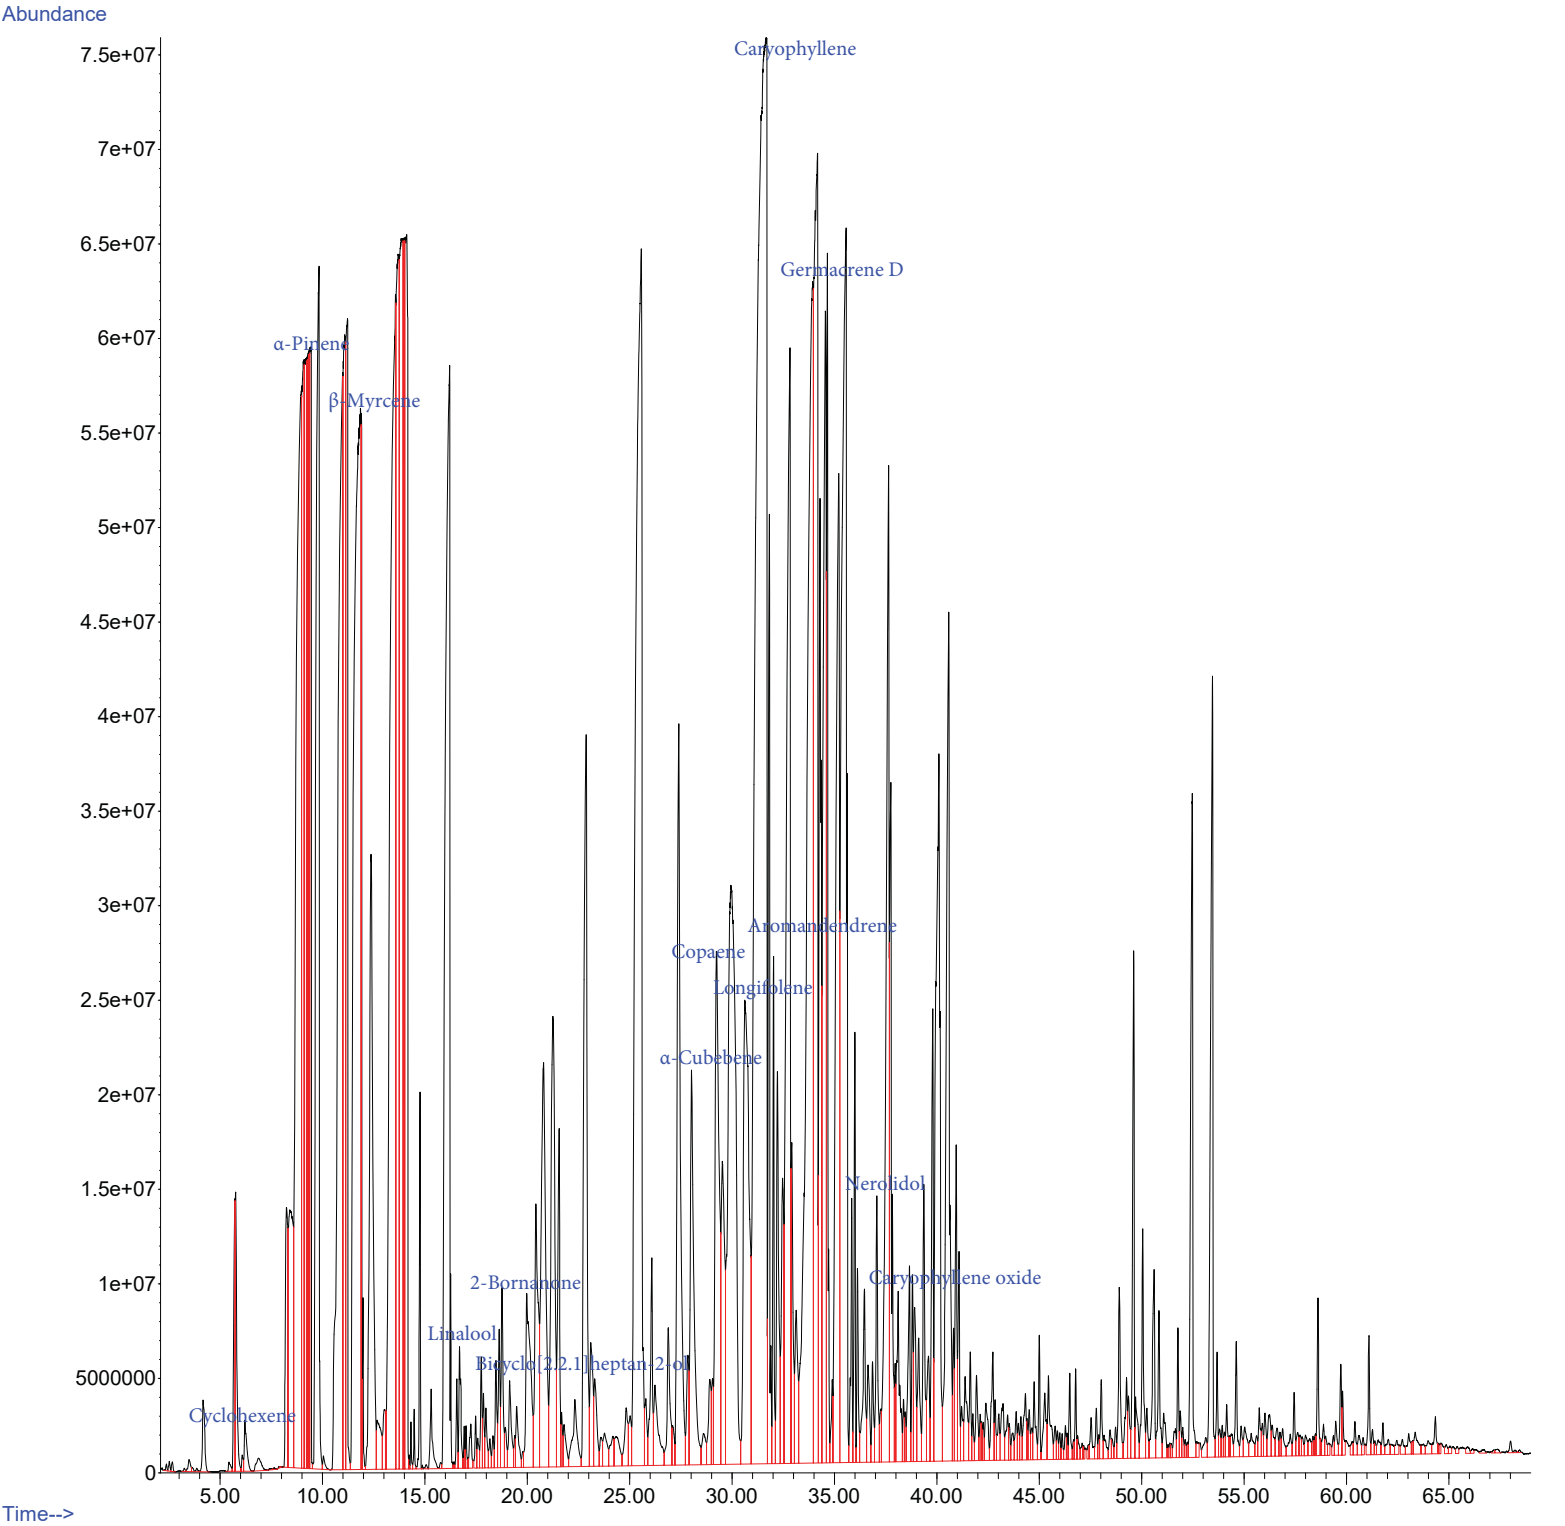

Supplement: s1 [file s1]
